# Supplementary material for: Gene Expression Profiles Associated with Pediatric Relapsed AML
Source: PubMed Central journal article supplement (PMC4388534; doi:10.1371/journal.pone.0121730), 2015-04-07

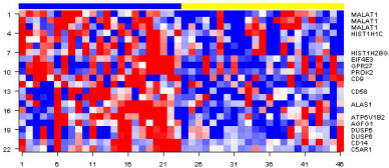

Supplement: pone.0121730.s001.pdf [file pone.0121730.s001.pdf]
