# Supplementary material for: Gene Expression Profiles Associated with Pediatric Relapsed AML
Source: PubMed Central journal article supplement (PMC4388534; doi:10.1371/journal.pone.0121730), 2015-04-07
Supplement: pone.0121730.s004.pdf [file pone.0121730.s004.pdf]

Supplementary Table 1. Mutation analysis of paired primary and relapse AML samples

| Pair | Stage     | Response | FLT3/ITD | AS1 | NPM1 | WT | PTEN1 | CEBPA | WT1 | Shh | Cytogenetic change |
|------|-----------|----------|----------|-----|------|----|-------|-------|-----|-----|--------------------|
| 1    | Diagnosis | CR       |          |     |      |    |       |       |     |     |                    |
|      | Relapse   | ND       |          |     |      |    |       |       |     |     |                    |
| 2    | Diagnosis | CR       |          |     |      |    |       |       |     |     |                    |
|      | Relapse   | CR       |          |     |      |    |       |       |     |     |                    |
| 3    | Diagnosis | CR       |          |     |      |    |       |       |     |     |                    |
|      | Relapse   | CR       |          |     |      |    |       |       |     |     |                    |
| 4    | Diagnosis | CR       |          |     |      |    |       |       |     |     |                    |
|      | Relapse   | CR       |          |     |      |    |       |       |     |     |                    |
| 5    | Diagnosis | CR       |          |     |      |    |       |       |     |     |                    |
|      | Relapse   | CR       |          |     |      |    |       |       |     |     |                    |
| 6    | Diagnosis | CR       |          |     |      |    |       |       |     |     |                    |
|      | Relapse   | CR       |          |     |      |    |       |       |     |     |                    |
| 7    | Diagnosis | NA       |          |     |      |    |       |       |     |     |                    |
|      | Relapse   | NA       |          |     |      |    |       |       |     |     |                    |
| 8    | Diagnosis | CR       |          |     |      |    |       |       |     |     |                    |
|      | Relapse   | CR       |          |     |      |    |       |       |     |     |                    |
| 9    | Diagnosis | NA       |          |     |      |    |       |       |     |     |                    |
|      | Relapse   | NA       |          |     |      |    |       |       |     |     |                    |
| 10   | Diagnosis | PR       |          |     |      |    |       |       |     |     |                    |
|      | Relapse   | ND       |          |     |      |    |       |       |     |     |                    |
| 11   | Diagnosis | CR       |          |     |      |    |       |       |     |     |                    |
|      | Relapse   | CR       |          |     |      |    |       |       |     |     |                    |
| 12   | Diagnosis | CR       |          |     |      |    |       |       |     |     |                    |
|      | Relapse   | CR       |          |     |      |    |       |       |     |     |                    |
| 13   | Diagnosis | CR       |          |     |      |    |       |       |     |     |                    |
|      | Relapse   | CR       |          |     |      |    |       |       |     |     |                    |
| 14   | Diagnosis | PR       |          |     |      |    |       |       |     |     |                    |
|      | Relapse   | CR       |          |     |      |    |       |       |     |     |                    |
| 15   | Diagnosis | CR       |          |     |      |    |       |       |     |     |                    |
|      | Relapse   | CR       |          |     |      |    |       |       |     |     |                    |
| 16   | Diagnosis | CR       |          |     |      |    |       |       |     |     |                    |
|      | Relapse   | CR       |          |     |      |    |       |       |     |     |                    |
| 17   | Diagnosis | NA       |          |     |      |    |       |       |     |     |                    |
|      | Relapse   | NA       |          |     |      |    |       |       |     |     |                    |
| 18   | Diagnosis | CR       |          |     |      |    |       |       |     |     |                    |
|      | Relapse   | CR       |          |     |      |    |       |       |     |     |                    |
| 19   | Diagnosis | NA       |          |     |      |    |       |       |     |     |                    |
|      | Relapse   | CR       |          |     |      |    |       |       |     |     |                    |
| 20   | Diagnosis | CR       |          |     |      |    |       |       |     |     |                    |
|      | Relapse   | CR       |          |     |      |    |       |       |     |     |                    |
| 21   | Diagnosis | CR       |          |     |      |    |       |       |     |     |                    |
|      | Relapse   | CR       |          |     |      |    |       |       |     |     |                    |
| 22   | Diagnosis | CR       |          |     |      |    |       |       |     |     |                    |
|      | Relapse   | CR       |          |     |      |    |       |       |     |     |                    |
| 23   | Diagnosis | NA       |          |     |      |    |       |       |     |     |                    |
|      | Relapse   | NA       |          |     |      |    |       |       |     |     |                    |

1 = mutated for selected gene, bold font = mutational shift between diagnosis and relapse, CR=complete response, PR=partial response, NA=response data not acquired
