# Supplementary material for: Gene Expression Profiles Associated with Pediatric Relapsed AML
Source: PubMed Central journal article supplement (PMC4388534; doi:10.1371/journal.pone.0121730), 2015-04-07
Supplement: pone.0121730.s005.pdf [file pone.0121730.s005.pdf]

**Supplementary Table 2 List of probesets that are co-expressed with HIST1H1C expression**

| <b>ProbeSet</b> | <b>Symbol</b> | <b>Correlation value</b> |
|-----------------|---------------|--------------------------|
| 209398_at       | HIST1H1C      | 1.00                     |
| 218280_x_at     | HIST2H2AA3    | 0.84                     |
| 222067_x_at     | HIST1H2BD     | 0.83                     |
| 214522_x_at     | HIST1H2AD     | 0.82                     |
| 208583_x_at     | HIST1H2AJ     | 0.82                     |
| 214542_x_at     | HIST1H2AI     | 0.81                     |
| 214290_s_at     | HIST2H2AA4    | 0.81                     |
| 208527_x_at     | HIST1H2BE     | 0.80                     |
| 208490_x_at     | HIST1H2BF     | 0.80                     |
| 214455_at       | HIST1H2BC     | 0.79                     |
| 208523_x_at     | HIST1H2BI     | 0.78                     |
| 208546_x_at     | HIST1H2BH     | 0.75                     |
| 202708_s_at     | HIST2H2BE     | 0.72                     |
| 208579_x_at     | H2BFS         | 0.71                     |
| 214472_at       | HIST1H3D      | 0.69                     |
| 236193_at       | HIST1H2BC     | 0.67                     |
| 214481_at       | HIST1H2AM     | 0.63                     |
| 239669_at       | HIST1H2AD     | 0.61                     |
| 215071_s_at     | HIST1H2AC     | 0.61                     |
| 208553_at       | HIST1H1E      | 0.61                     |
| 214554_at       | HIST1H2AL     | 0.60                     |
| 214469_at       | HIST1H2AE     | 0.59                     |
| 214540_at       | HIST1H2BO     | 0.58                     |
| 208575_at       | HIST1H3A      | 0.58                     |
| 206110_at       | HIST1H3H      | 0.58                     |
| 206951_at       | HIST1H4E      | 0.57                     |
| 211999_at       | H3F3B         | 0.56                     |
| 209806_at       | HIST1H2BK     | 0.55                     |
| 1556814_a_at    | ---           | 0.55                     |
| 209069_s_at     | H3F3B         | 0.54                     |
| 211997_x_at     | H3F3B         | 0.53                     |
| 209911_x_at     | HIST1H2BD     | 0.53                     |
| 215779_s_at     | HIST1H2BG     | 0.52                     |
| 230795_at       | HIST2H4       | 0.51                     |
| 204805_s_at     | H1FX          | 0.51                     |
