# Supplementary material for: Gene Expression Profiles Associated with Pediatric Relapsed AML
Source: PubMed Central journal article supplement (PMC4388534; doi:10.1371/journal.pone.0121730), 2015-04-07
Supplement: pone.0121730.s006.pdf [file pone.0121730.s006.pdf]

**Supplementary Table 3 List of 306 probe-sets of the classifier that discriminates between initial and relapse AML samples, ranked according to *P*-value**

| Geometric mean of intensities relapse/diagnosis | Parametric p-value | t-value | ProbeSet     | Symbol   | Name                                                                        |
|-------------------------------------------------|--------------------|---------|--------------|----------|-----------------------------------------------------------------------------|
| 0.93                                            | 0.0000015000       | -6.521  | 202175_at    | CHPF     | chondroitin polymerizing factor                                             |
| 1.17                                            | 0.0000092000       | 5.727   | 230462_at    | NUMB     | numb homolog (Drosophila)                                                   |
| 0.92                                            | 0.0000121000       | -5.615  | 206815_at    | SPAG8    | sperm associated antigen 8                                                  |
| 0.91                                            | 0.0000224000       | -5.355  | 206408_at    | LRRTM2   | leucine rich repeat transmembrane neuronal 2                                |
| 0.92                                            | 0.0000739000       | -4.860  | 230228_at    | SSC5D    | scavenger receptor cysteine rich domain containing (5 domains)              |
| 0.91                                            | 0.0000765000       | -4.846  | 1569904_x_at | NA       | NA                                                                          |
| 1.06                                            | 0.0000794000       | 4.831   | 219943_s_at  | USP46    | ubiquitin specific peptidase 46                                             |
| 1.24                                            | 0.0000930000       | 4.766   | 225941_at    | EIF4E3   | eukaryotic translation initiation factor 4E family member 3                 |
| 1.38                                            | 0.0001154000       | 4.677   | 224558_s_at  | MALAT1   | metastasis associated lung adenocarcinoma transcript 1 (non-protein coding) |
| 0.94                                            | 0.0001276000       | -4.636  | 232211_at    | PPP1R3F  | protein phosphatase 1, regulatory (inhibitor) subunit 3F                    |
| 1.67                                            | 0.0001277000       | 4.636   | 224917_at    | NA       | NA                                                                          |
| 1.3                                             | 0.0001355000       | 4.612   | 241751_at    | OFD1     | oral-facial-digital syndrome 1                                              |
| 1.11                                            | 0.0001480000       | 4.575   | 221813_at    | FBXO42   | F-box protein 42                                                            |
| 0.94                                            | 0.0001517000       | -4.565  | 214432_at    | ATP1A3   | ATPase, Na+/K+ transporting, alpha 3 polypeptide                            |
| 0.95                                            | 0.0001597000       | -4.544  | 223975_at    | SPRYD5   | SPRY domain containing 5                                                    |
| 1.06                                            | 0.0001867000       | 4.480   | 1570600_at   | NA       | NA                                                                          |
| 1.34                                            | 0.0001877000       | 4.478   | 204872_at    | TLE4     | transducin-like enhancer of split 4 (E(sp1) homolog, Drosophila)            |
| 0.94                                            | 0.0001977000       | -4.457  | 233787_at    | C6orf163 | chromosome 6 open reading frame 163                                         |
| 1.08                                            | 0.0002091000       | 4.434   | 205094_at    | PEX12    | peroxisomal biogenesis factor 12                                            |
| 0.94                                            | 0.0002258000       | -4.402  | 215370_at    | NA       | NA                                                                          |
| 0.93                                            | 0.0002332000       | -4.389  | 240720_at    | NA       | NA                                                                          |
| 0.94                                            | 0.0002475000       | -4.365  | 226051_at    | SELM     | selenoprotein M                                                             |
| 1.24                                            | 0.0002629000       | 4.340   | 231310_at    | NA       | NA                                                                          |
| 1.23                                            | 0.0002823000       | 4.311   | 217730_at    | TMBIM1   | transmembrane BAX inhibitor motif containing 1                              |
| 0.9                                             | 0.0002949000       | -4.293  | 228376_at    | GGTA1    | glycoprotein, alpha-galactosyltransferase 1 pseudogene                      |
| 0.93                                            | 0.0003195000       | -4.260  | 227023_at    | NA       | NA                                                                          |
| 0.92                                            | 0.0003221000       | -4.257  | 239799_at    | C9orf130 | chromosome 9 open reading frame 130                                         |
| 1.26                                            | 0.0003358000       | 4.240   | 225940_at    | EIF4E3   | eukaryotic translation initiation factor 4E family member 3                 |
| 1.07                                            | 0.0003630000       | 4.208   | 1569201_a_at | NA       | NA                                                                          |
| 0.9                                             | 0.0003670000       | -4.204  | 222720_x_at  | C1orf27  | chromosome 1 open reading frame 27                                          |
| 0.94                                            | 0.0003915000       | -4.177  | 204400_at    | EFS      | embryonal Fyn-associated substrate                                          |
| 1.18                                            | 0.0003984000       | 4.170   | 222163_s_at  | SPATA5L1 | spermatogenesis associated 5-like 1                                         |
| 0.95                                            | 0.0004119000       | -4.156  | 234057_at    | NA       | NA                                                                          |
| 1.13                                            | 0.0004546000       | 4.116   | 212804_s_at  | GAPVD1   | GTPase activating protein and VPS9 domains 1                                |
| 1.16                                            | 0.0005113000       | 4.068   | 213926_s_at  | AGFG1    | ArfGAP with FG repeats 1                                                    |
| 1.14                                            | 0.0005208000       | 4.060   | 226175_at    | TTC9C    | tetratricopeptide repeat domain 9C                                          |
| 0.9                                             | 0.0005213000       | -4.060  | 211909_x_at  | PTGER3   | prostaglandin E receptor 3 (subtype EP3)                                    |
| 0.93                                            | 0.0005317000       | -4.052  | 210089_s_at  | LAMA4    | laminin, alpha 4                                                            |
| 0.94                                            | 0.0005495000       | -4.038  | 205272_s_at  | NA       | NA                                                                          |
| 0.94                                            | 0.0005739000       | -4.020  | 216358_at    | NA       | NA                                                                          |
| 1.11                                            | 0.0005834000       | 4.014   | 202055_at    | KPNA1    | karyopherin alpha 1 (importin alpha 5)                                      |
| 0.9                                             | 0.0005971000       | -4.004  | 238057_at    | USP45    | ubiquitin specific peptidase 45                                             |
| 0.94                                            | 0.0006086000       | -3.996  | 237087_at    | NA       | NA                                                                          |
| 0.95                                            | 0.0006206000       | -3.988  | 217156_at    | NA       | NA                                                                          |
| 1.19                                            | 0.0006671000       | 3.959   | 225378_at    | VPS37A   | vacuolar protein sorting 37 homolog A (S. cerevisiae)                       |
| 0.92                                            | 0.0006853000       | -3.948  | 204292_x_at  | STK11    | serine/threonine kinase 11                                                  |
| 1.14                                            | 0.0006925000       | 3.943   | 223089_at    | VEZT     | vezatin, adherens junctions transmembrane protein                           |
| 0.94                                            | 0.0006984000       | -3.940  | 207896_s_at  | DLEC1    | deleted in lung and esophageal cancer 1                                     |
| 1.06                                            | 0.0007058000       | 3.935   | 1569597_at   | NA       | NA                                                                          |
| 0.94                                            | 0.0007063000       | -3.935  | 239576_at    | MTUS1    | microtubule associated tumor suppressor 1                                   |
| 0.95                                            | 0.0007225000       | -3.926  | 244572_at    | KY       | kyphocoliosis peptidase                                                     |
| 0.92                                            | 0.0007503000       | -3.910  | 229561_at    | LRRC16B  | leucine rich repeat containing 16B                                          |
| 1.16                                            | 0.0007711000       | 3.899   | 203615_x_at  | SULT1A1  | sulfotransferase family, cytosolic, 1A, phenol-preferring, member 1         |
| 0.89                                            | 0.0007723000       | -3.898  | 204718_at    | EPHB6    | EPH receptor B6                                                             |
| 0.95                                            | 0.0008226000       | -3.873  | 206913_at    | BAAT     | bile acid CoA: amino acid N-acyltransferase (glycine N-choloyltransferase)  |
| 1.14                                            | 0.0008631000       | 3.853   | 222839_s_at  | PAPOLG   | poly(A) polymerase gamma                                                    |

**Supplementary Table 3 List of 306 probe-sets of the classifier that discriminates between initial and relapse AML samples, ranked according to *P*-value**

| Geometric mean of intensities relapse/diagnosis | Parametric p-value | t-value | ProbeSet     | Symbol       | Name                                                                              |
|-------------------------------------------------|--------------------|---------|--------------|--------------|-----------------------------------------------------------------------------------|
| 1.12                                            | 0.0008901000       | 3.840   | 219340_s_at  | CLN8         | ceroid-lipofuscinosis, neuronal 8 (epilepsy, progressive with mental retardation) |
| 1.15                                            | 0.0009008000       | 3.835   | 225939_at    | EIF4E3       | eukaryotic translation initiation factor 4E family member 3                       |
| 0.95                                            | 0.0009129000       | -3.830  | 208432_s_at  | CACNA1E      | calcium channel, voltage-dependent, R type, alpha 1E subunit                      |
| 1.09                                            | 0.0009449000       | 3.815   | 219124_at    | C8orf41      | chromosome 8 open reading frame 41                                                |
| 0.93                                            | 0.0009468000       | -3.815  | 213650_at    | NA NA        |                                                                                   |
| 1.05                                            | 0.0010180000       | 3.785   | 1557311_at   | LOC100131354 | hypothetical protein LOC100131354                                                 |
| 0.95                                            | 0.0010491000       | -3.772  | 228965_s_at  | PANK2        | pantothenate kinase 2                                                             |
| 1.04                                            | 0.0010635000       | 3.767   | 1558645_at   | MIB1         | mindbomb homolog 1 (Drosophila)                                                   |
| 0.94                                            | 0.0010677000       | -3.765  | 229009_at    | SIX5         | SIX homeobox 5                                                                    |
| 0.94                                            | 0.0011042000       | -3.751  | 204724_s_at  | COL9A3       | collagen, type IX, alpha 3                                                        |
| 0.92                                            | 0.0011099000       | -3.749  | 225428_s_at  | DDX54        | DEAD (Asp-Glu-Ala-Asp) box polypeptide 54                                         |
| 0.94                                            | 0.0011516000       | -3.734  | 240672_at    | NA NA        |                                                                                   |
| 1.05                                            | 0.0011611000       | 3.730   | 238374_at    | H1FNT        | H1 histone family, member N, testis-specific                                      |
| 0.94                                            | 0.0011808000       | -3.724  | 241637_at    | NA NA        |                                                                                   |
| 1.13                                            | 0.0011808000       | 3.724   | 230590_at    | NA NA        |                                                                                   |
| 1.06                                            | 0.0011852000       | 3.722   | 224028_at    | CPA6         | carboxypeptidase A6                                                               |
| 1.75                                            | 0.0011881000       | 3.721   | 227769_at    | GPR27        | G protein-coupled receptor 27                                                     |
| 0.93                                            | 0.0012068000       | -3.715  | 228405_at    | RHPN1        | rhophilin, Rho GTPase binding protein 1                                           |
| 0.94                                            | 0.0012219000       | -3.709  | 1555748_x_at | CD79B        | CD79b molecule, immunoglobulin-associated beta                                    |
| 0.91                                            | 0.0012706000       | -3.693  | 217555_at    | SMC1A        | structural maintenance of chromosomes 1A                                          |
| 1.04                                            | 0.0012758000       | 3.692   | 1562918_at   | NA NA        |                                                                                   |
| 0.83                                            | 0.0012796000       | -3.690  | 221861_at    | ARRB1        | arrestin, beta 1                                                                  |
| 1.07                                            | 0.0012922000       | 3.686   | 223313_s_at  | NA NA        |                                                                                   |
| 0.95                                            | 0.0012958000       | -3.685  | 206623_at    | PDE6A        | phosphodiesterase 6A, cGMP-specific, rod, alpha                                   |
| 0.95                                            | 0.0013207000       | -3.677  | 216827_at    | NA NA        |                                                                                   |
| 1.15                                            | 0.0013556000       | 3.666   | 244075_at    | NA NA        |                                                                                   |
| 0.95                                            | 0.0013737000       | -3.661  | 216636_at    | NA NA        |                                                                                   |
| 0.96                                            | 0.0014019000       | -3.653  | 230818_at    | NA NA        |                                                                                   |
| 0.93                                            | 0.0014343000       | -3.643  | 1567575_at   | NA NA        |                                                                                   |
| 1.1                                             | 0.0014665000       | 3.634   | 228037_at    | NA NA        |                                                                                   |
| 1.07                                            | 0.0014732000       | 3.632   | 1562511_at   | LYST         | lysosomal trafficking regulator                                                   |
| 0.91                                            | 0.0014767000       | -3.631  | 205375_at    | MDF1         | MyoD family inhibitor                                                             |
| 0.94                                            | 0.0014928000       | -3.627  | 211577_s_at  | IGF1         | insulin-like growth factor 1 (somatomedin C)                                      |
| 1.04                                            | 0.0015095000       | 3.622   | 228085_at    | LOC100507419 | hypothetical protein LOC100507419                                                 |
| 1.06                                            | 0.0015171000       | 3.620   | 238818_at    | KIAA1429     | KIAA1429                                                                          |
| 1.18                                            | 0.0015522000       | 3.610   | 213291_s_at  | UBE3A        | ubiquitin protein ligase E3A                                                      |
| 1.37                                            | 0.0015638000       | 3.607   | 214472_at    | NA NA        |                                                                                   |
| 1.07                                            | 0.0015645000       | 3.607   | 204863_s_at  | IL6ST        | interleukin 6 signal transducer (gp130, oncostatin M receptor)                    |
| 0.94                                            | 0.0015744000       | -3.604  | 229365_at    | PPP1R3F      | protein phosphatase 1, regulatory (inhibitor) subunit 3F                          |
| 0.96                                            | 0.0015810000       | -3.603  | 221977_at    | TBX2         | T-box 2                                                                           |
| 0.93                                            | 0.0015925000       | -3.600  | 217277_at    | NA NA        |                                                                                   |
| 1.06                                            | 0.0016159000       | 3.594   | 1554557_at   | ATP11B       | ATPase, class VI, type 11B                                                        |
| 0.95                                            | 0.0016215000       | -3.592  | 216402_at    | SEC14L4      | SEC14-like 4 (S. cerevisiae)                                                      |
| 0.93                                            | 0.0016246000       | -3.591  | 215384_s_at  | MAP1A        | microtubule-associated protein 1A                                                 |
| 1.16                                            | 0.0016539000       | 3.584   | 201997_s_at  | SPEN         | spen homolog, transcriptional regulator (Drosophila)                              |
| 1.07                                            | 0.0016572000       | 3.583   | 224276_at    | ZNF33A       | zinc finger protein 33A                                                           |
| 0.94                                            | 0.0016629000       | -3.582  | 205168_at    | DDR2         | discoidin domain receptor tyrosine kinase 2                                       |
| 0.96                                            | 0.0016655000       | -3.581  | 234275_at    | NA NA        |                                                                                   |
| 1.18                                            | 0.0016669000       | 3.581   | 201628_s_at  | RRAGA        | Ras-related GTP binding A                                                         |
| 0.94                                            | 0.0016933000       | -3.574  | 221198_at    | SCT          | secretin                                                                          |
| 0.9                                             | 0.0017242000       | -3.567  | 1568754_at   | NA NA        |                                                                                   |
| 0.92                                            | 0.0017295000       | -3.565  | 1555475_x_at | TTLL3        | tubulin tyrosine ligase-like family, member 3                                     |
| 0.95                                            | 0.0017313000       | -3.565  | 1553467_at   | FLJ32742     | hypothetical locus FLJ32742                                                       |
| 1.08                                            | 0.0017889000       | 3.551   | 217948_at    | FAM127B      | family with sequence similarity 127, member B                                     |
| 1.22                                            | 0.0018248000       | 3.543   | 223081_at    | PHF23        | PHD finger protein 23                                                             |

**Supplementary Table 3 List of 306 probe-sets of the classifier that discriminates between initial and relapse AML samples, ranked according to *P*-value**

| Geometric mean of intensities relapse/diagnosis | Parametric p-value | t-value | ProbeSet     | Symbol       | Name                                                                             |
|-------------------------------------------------|--------------------|---------|--------------|--------------|----------------------------------------------------------------------------------|
| 0.83                                            | 0.0018480000       | -3.538  | 49111_at     | ARRB1        | arrestin, beta 1                                                                 |
| 0.96                                            | 0.0018784000       | -3.531  | 213307_at    | SHANK2       | SH3 and multiple ankyrin repeat domains 2                                        |
| 1.15                                            | 0.0019189000       | 3.522   | 225402_at    | TP53RK       | TP53 regulating kinase                                                           |
| 0.95                                            | 0.0019222000       | -3.522  | 202482_x_at  | RANBP1       | RAN binding protein 1                                                            |
| 0.95                                            | 0.0019465000       | -3.516  | 239781_at    | NA           | NA                                                                               |
| 1.2                                             | 0.0019486000       | 3.516   | 201758_at    | TSG101       | tumor susceptibility gene 101                                                    |
| 0.94                                            | 0.0019785000       | -3.509  | 204078_at    | LEPREL4      | leprecan-like 4                                                                  |
| 0.92                                            | 0.0019982000       | -3.505  | 206960_at    | LPAR4        | lysophosphatidic acid receptor 4                                                 |
| 0.96                                            | 0.0019985000       | -3.505  | 219902_at    | BHMT2        | betaine--homocysteine S-methyltransferase 2                                      |
| 1.23                                            | 0.0019988000       | 3.505   | 241036_at    | NA           | NA                                                                               |
| 0.94                                            | 0.0020083000       | -3.503  | 224633_s_at  | GPATCH4      | G patch domain containing 4                                                      |
| 1.18                                            | 0.0020218000       | 3.500   | 244482_at    | NA           | NA                                                                               |
| 1.08                                            | 0.0020469000       | 3.495   | 228899_at    | LOC100132884 | hypothetical protein LOC100132884                                                |
| 1.07                                            | 0.0020473000       | 3.495   | 210189_at    | HSPA1L       | heat shock 70kDa protein 1-like                                                  |
| 0.94                                            | 0.0020475000       | -3.495  | 234429_at    | LOC100506667 | hypothetical protein LOC100506667                                                |
| 0.93                                            | 0.0020503000       | -3.495  | 229324_x_at  | ISYNA1       | inositol-3-phosphate synthase 1                                                  |
| 0.93                                            | 0.0020541000       | -3.494  | 238823_at    | FMNL3        | formin-like 3                                                                    |
| 0.95                                            | 0.0020770000       | -3.489  | 240171_at    | NA           | NA                                                                               |
| 1.05                                            | 0.0020773000       | 3.489   | 205410_s_at  | ATP2B4       | ATPase, Ca++ transporting, plasma membrane 4                                     |
| 0.95                                            | 0.0020799000       | -3.489  | 227218_at    | RLTPR        | RGD motif, leucine rich repeats, tropomodulin domain and proline-rich containing |
| 0.94                                            | 0.0020827000       | -3.488  | 235845_at    | SP5          | Sp5 transcription factor                                                         |
| 1.22                                            | 0.0021115000       | 3.482   | 223090_x_at  | VEZT         | vezatin, adherens junctions transmembrane protein                                |
| 0.96                                            | 0.0021149000       | -3.482  | 1555580_at   | NA           | NA                                                                               |
| 1.07                                            | 0.0021783000       | 3.469   | 202618_s_at  | MECP2        | methyl CpG binding protein 2 (Rett syndrome)                                     |
| 0.83                                            | 0.0022301000       | -3.460  | 224870_at    | KIAA0114     | KIAA0114                                                                         |
| 1.07                                            | 0.0022315000       | 3.459   | 203950_s_at  | CLCN6        | chloride channel 6                                                               |
| 0.95                                            | 0.0022337000       | -3.459  | 1555027_at   | P4HA2        | prolyl 4-hydroxylase, alpha polypeptide II                                       |
| 0.94                                            | 0.0022512000       | -3.456  | 211532_x_at  | KIR2DS2      | killer cell immunoglobulin-like receptor, two domains, short cytoplasmic tail, 2 |
| 0.95                                            | 0.0023512000       | -3.437  | 243392_at    | USP49        | ubiquitin specific peptidase 49                                                  |
| 1.07                                            | 0.0023610000       | 3.436   | 48612_at     | N4BP1        | NEDD4 binding protein 1                                                          |
| 1.04                                            | 0.0023912000       | 3.430   | 1556261_a_at | NA           | NA                                                                               |
| 1.3                                             | 0.0023980000       | 3.429   | 201651_s_at  | PAC SIN2     | protein kinase C and casein kinase substrate in neurons 2                        |
| 0.94                                            | 0.0024603000       | -3.418  | 229227_at    | FLJ45244     | hypothetical locus FLJ45244                                                      |
| 0.94                                            | 0.0024713000       | -3.417  | 240797_at    | PERP         | PERP, TP53 apoptosis effector                                                    |
| 0.94                                            | 0.0024844000       | -3.414  | 220554_at    | SLC22A7      | solute carrier family 22 (organic anion transporter), member 7                   |
| 0.93                                            | 0.0024931000       | -3.413  | 203027_s_at  | MVD          | mevalonate (diphospho) decarboxylase                                             |
| 0.96                                            | 0.0025019000       | -3.411  | 230744_at    | FSTL1        | folliculin-like 1                                                                |
| 0.94                                            | 0.0025129000       | -3.410  | 216661_x_at  | CYP2C9       | cytochrome P450, family 2, subfamily C, polypeptide 9                            |
| 0.92                                            | 0.0025212000       | -3.408  | 239522_at    | IL12RB1      | interleukin 12 receptor, beta 1                                                  |
| 0.94                                            | 0.0025215000       | -3.408  | 206598_at    | INS          | insulin                                                                          |
| 1.11                                            | 0.0025233000       | 3.408   | 203160_s_at  | RNF8         | ring finger protein 8                                                            |
| 0.94                                            | 0.0025314000       | -3.407  | 217361_at    | NA           | NA                                                                               |
| 1.04                                            | 0.0025575000       | 3.402   | 236563_at    | RD3          | retinal degeneration 3                                                           |
| 1.14                                            | 0.0025696000       | 3.400   | 202128_at    | KIAA0317     | KIAA0317                                                                         |
| 1.34                                            | 0.0025869000       | 3.397   | 218092_s_at  | AGFG1        | ArfGAP with FG repeats 1                                                         |
| 0.94                                            | 0.0025890000       | -3.397  | 215594_at    | NA           | NA                                                                               |
| 1.06                                            | 0.0026391000       | 3.389   | 234346_x_at  | NA           | NA                                                                               |
| 0.93                                            | 0.0026620000       | -3.385  | 202366_at    | ACADS        | acyl-CoA dehydrogenase, C-2 to C-3 short chain                                   |
| 1.05                                            | 0.0027098000       | 3.378   | 233844_at    | CD99L2       | CD99 molecule-like 2                                                             |
| 0.93                                            | 0.0027371000       | -3.374  | 1564066_at   | TMEM151B     | transmembrane protein 151B                                                       |
| 0.94                                            | 0.0027548000       | -3.371  | 217135_x_at  | NA           | NA                                                                               |
| 0.95                                            | 0.0027639000       | -3.370  | 223992_x_at  | ZCWPW1       | zinc finger, CW type with PWWP domain 1                                          |
| 0.93                                            | 0.0028235000       | -3.361  | 230297_x_at  | SYNGAP1      | synaptic Ras GTPase activating protein 1                                         |
| 0.95                                            | 0.0028319000       | -3.359  | 1562004_x_at | MYOZ3        | myozenin 3                                                                       |
| 1.09                                            | 0.0028390000       | 3.358   | 221980_at    | EMLIN2       | elastin microfibril interfacer 2                                                 |

**Supplementary Table 3 List of 306 probe-sets of the classifier that discriminates between initial and relapse AML samples, ranked according to *P*-value**

| Geometric mean of intensities relapse/diagnosis | Parametric p-value | t-value | ProbeSet     | Symbol     | Name                                                                              |
|-------------------------------------------------|--------------------|---------|--------------|------------|-----------------------------------------------------------------------------------|
| 1.08                                            | 0.0028641000       | 3.355   | 203644_s_at  | MON1B      | MON1 homolog B (yeast)                                                            |
| 1.07                                            | 0.0028650000       | 3.355   | 244578_at    | LCP2       | lymphocyte cytosolic protein 2 (SH2 domain containing leukocyte protein of 76kDa) |
| 1.15                                            | 0.0028723000       | 3.354   | 229773_at    | SNAP23     | synaptosomal-associated protein, 23kDa                                            |
| 1.25                                            | 0.0028852000       | 3.352   | 208901_s_at  | TOP1       | topoisomerase (DNA) I                                                             |
| 0.96                                            | 0.0028886000       | -3.351  | 1554405_a_at | NCRNA00161 | non-protein coding RNA 161                                                        |
| 1.33                                            | 0.0029007000       | 3.349   | 201089_at    | ATP6V1B2   | ATPase, H+ transporting, lysosomal 56/58kDa, V1 subunit B2                        |
| 1.06                                            | 0.0029060000       | 3.349   | 210990_s_at  | LAMA4      | laminin, alpha 4                                                                  |
| 0.88                                            | 0.0029108000       | -3.348  | 218051_s_at  | NT5DC2     | 5'-nucleotidase domain containing 2                                               |
| 0.94                                            | 0.0029123000       | -3.348  | 229880_at    | NA         | NA                                                                                |
| 1.15                                            | 0.0029697000       | 3.340   | 215017_s_at  | FNBP1L     | formin binding protein 1-like                                                     |
| 1.06                                            | 0.0029845000       | 3.337   | 226122_at    | PLEKHG1    | pleckstrin homology domain containing, family G (with RhoGef domain) member 1     |
| 1.12                                            | 0.0029895000       | 3.337   | 1559490_at   | LRCH3      | leucine-rich repeats and calponin homology (CH) domain containing 3               |
| 0.94                                            | 0.0029993000       | -3.335  | 232869_at    | SRGAP3     | SLIT-ROBO Rho GTPase activating protein 3                                         |
| 0.9                                             | 0.0030077000       | -3.334  | 211052_s_at  | TBCD       | tubulin folding cofactor D                                                        |
| 1.1                                             | 0.0030322000       | 3.331   | 239842_x_at  | NA         | NA                                                                                |
| 1.13                                            | 0.0030334000       | 3.331   | 229795_at    | NA         | NA                                                                                |
| 1.18                                            | 0.0030526000       | 3.328   | 205664_at    | KIN        | KIN, antigenic determinant of recA protein homolog (mouse)                        |
| 1.13                                            | 0.0031164000       | 3.319   | 238589_s_at  | NA         | NA                                                                                |
| 0.95                                            | 0.0031198000       | -3.319  | 236457_at    | GTDC1      | glycosyltransferase-like domain containing 1                                      |
| 1.38                                            | 0.0031287000       | 3.318   | 231735_s_at  | MALAT1     | metastasis associated lung adenocarcinoma transcript 1 (non-protein coding)       |
| 1.35                                            | 0.0031321000       | 3.317   | 207785_s_at  | RBPJ       | recombination signal binding protein for immunoglobulin kappa J region            |
| 1.7                                             | 0.0031428000       | 3.316   | 210387_at    | NA         | NA                                                                                |
| 1.09                                            | 0.0031639000       | 3.313   | 1557477_at   | NA         | NA                                                                                |
| 1.13                                            | 0.0031706000       | 3.312   | 241936_x_at  | NA         | NA                                                                                |
| 0.81                                            | 0.0031767000       | -3.311  | 43511_s_at   | ARRB1      | arrestin, beta 1                                                                  |
| 0.94                                            | 0.0031809000       | -3.311  | 217438_at    | NA         | NA                                                                                |
| 0.97                                            | 0.0031951000       | -3.309  | 1553846_at   | SPERT      | spermatid associated                                                              |
| 0.69                                            | 0.0032024000       | -3.308  | 238365_s_at  | C1orf228   | chromosome 1 open reading frame 228                                               |
| 0.95                                            | 0.0032345000       | -3.304  | 231196_x_at  | NCRNA00202 | non-protein coding RNA 202                                                        |
| 1.1                                             | 0.0032413000       | 3.303   | 223118_s_at  | USP47      | ubiquitin specific peptidase 47                                                   |
| 1.08                                            | 0.0032527000       | 3.301   | 217928_s_at  | PPP6R3     | protein phosphatase 6, regulatory subunit 3                                       |
| 1.12                                            | 0.0032721000       | 3.299   | 218532_s_at  | FAM134B    | family with sequence similarity 134, member B                                     |
| 1.14                                            | 0.0032892000       | 3.297   | 232094_at    | C15orf29   | chromosome 15 open reading frame 29                                               |
| 0.96                                            | 0.0032903000       | -3.296  | 236020_s_at  | TRUB1      | TruB pseudouridine (psi) synthase homolog 1 (E. coli)                             |
| 1.07                                            | 0.0032912000       | 3.296   | 241827_at    | ZNF615     | zinc finger protein 615                                                           |
| 1.09                                            | 0.0033460000       | 3.289   | 207292_s_at  | MAPK7      | mitogen-activated protein kinase 7                                                |
| 0.94                                            | 0.0033555000       | -3.288  | 218550_s_at  | LRRC20     | leucine rich repeat containing 20                                                 |
| 1.04                                            | 0.0033592000       | 3.288   | 228229_at    | ZNF526     | zinc finger protein 526                                                           |
| 1.07                                            | 0.0033685000       | 3.286   | 1570135_at   | ZNF230     | zinc finger protein 230                                                           |
| 0.96                                            | 0.0033771000       | -3.285  | 232191_at    | C21orf105  | chromosome 21 open reading frame 105                                              |
| 0.93                                            | 0.0033781000       | -3.285  | 215695_s_at  | GYG2       | glycogenin 2                                                                      |
| 1.22                                            | 0.0033835000       | 3.285   | 222763_s_at  | WDR33      | WD repeat domain 33                                                               |
| 1.05                                            | 0.0034195000       | 3.280   | 1553466_at   | CXorf59    | chromosome X open reading frame 59                                                |
| 1.18                                            | 0.0034238000       | 3.280   | 226840_at    | H2AFY      | H2A histone family, member Y                                                      |
| 0.89                                            | 0.0034502000       | -3.276  | 205339_at    | STIL       | SCL/TAL1 interrupting locus                                                       |
| 1.1                                             | 0.0034564000       | 3.276   | 213405_at    | RAB22A     | RAB22A, member RAS oncogene family                                                |
| 1.07                                            | 0.0034618000       | 3.275   | 216000_at    | NA         | NA                                                                                |
| 1.12                                            | 0.0034662000       | 3.274   | 221502_at    | KPNA3      | karyopherin alpha 3 (importin alpha 4)                                            |
| 0.94                                            | 0.0034675000       | -3.274  | 211457_at    | GABARAPL3  | GABA(A) receptors associated protein like 3, pseudogene                           |
| 1.06                                            | 0.0035007000       | 3.270   | 215053_at    | SRCAP      | Snf2-related CREBBP activator protein                                             |
| 1.33                                            | 0.0035071000       | 3.269   | 223577_x_at  | MALAT1     | metastasis associated lung adenocarcinoma transcript 1 (non-protein coding)       |
| 0.95                                            | 0.0035254000       | -3.267  | 227097_at    | ZNF800     | zinc finger protein 800                                                           |
| 1.21                                            | 0.0035546000       | 3.264   | 208865_at    | CSNK1A1    | casein kinase 1, alpha 1                                                          |
| 0.93                                            | 0.0035552000       | -3.264  | 214903_at    | SYT2       | synaptotagmin II                                                                  |

**Supplementary Table 3 List of 306 probe-sets of the classifier that discriminates between initial and relapse AML samples, ranked according to P-value**

| Geometric mean of intensities relapse/diagnosis | Parametric p-value | t-value | ProbeSet    | Symbol    | Name                                                                              |
|-------------------------------------------------|--------------------|---------|-------------|-----------|-----------------------------------------------------------------------------------|
| 0.93                                            | 0.0035686000       | -3.262  | 220838_at   | EXD3      | exonuclease 3'-5' domain containing 3                                             |
| 0.94                                            | 0.0035748000       | -3.261  | 215425_at   | BTG3      | BTG family, member 3                                                              |
| 1.15                                            | 0.0035902000       | 3.260   | 225121_at   | TBC1D23   | TBC1 domain family, member 23                                                     |
| 1.23                                            | 0.0035950000       | 3.259   | 208943_s_at | SEC62     | SEC62 homolog (S. cerevisiae)                                                     |
| 0.86                                            | 0.0035966000       | -3.259  | 230481_at   | ACY3      | aspartoacylase (aminocyclase) 3                                                   |
| 0.92                                            | 0.0035971000       | -3.259  | 214797_s_at | CDK18     | cyclin-dependent kinase 18                                                        |
| 0.94                                            | 0.0036034000       | -3.258  | 208401_s_at | GLP1R     | glucagon-like peptide 1 receptor                                                  |
| 1.62                                            | 0.0036165000       | 3.256   | 209398_at   | HIST1H1C  | histone cluster 1, H1c                                                            |
| 1.14                                            | 0.0036331000       | 3.255   | 211385_x_at | SULT1A2   | sulfotransferase family, cytosolic, 1A, phenol-preferring, member 2               |
| 0.93                                            | 0.0036469000       | -3.253  | 238229_at   | TMEM67    | transmembrane protein 67                                                          |
| 1.1                                             | 0.0036576000       | 3.252   | 207122_x_at | SULT1A2   | sulfotransferase family, cytosolic, 1A, phenol-preferring, member 2               |
| 1.05                                            | 0.0036588000       | 3.252   | 238819_at   | ZNF347    | zinc finger protein 347                                                           |
| 1.2                                             | 0.0036720000       | 3.250   | 205474_at   | CRLF3     | cytokine receptor-like factor 3                                                   |
| 1.05                                            | 0.0036965000       | 3.247   | 1555348_at  | TFAP2E    | transcription factor AP-2 epsilon (activating enhancer binding protein 2 epsilon) |
| 0.95                                            | 0.0037171000       | -3.245  | 1557357_at  | LOC440944 | hypothetical LOC440944                                                            |
| 1.08                                            | 0.0037332000       | 3.243   | 220610_s_at | LRRFIP2   | leucine rich repeat (in FLII) interacting protein 2                               |
| 0.92                                            | 0.0037391000       | -3.242  | 214174_s_at | PDLIM4    | PDZ and LIM domain 4                                                              |
| 1.47                                            | 0.0037577000       | 3.240   | 201743_at   | CD14      | CD14 molecule                                                                     |
| 0.95                                            | 0.0037786000       | -3.238  | 244231_at   | NA        | NA                                                                                |
| 0.9                                             | 0.0037794000       | -3.238  | 201709_s_at | NIPSNAP1  | nipsnap homolog 1 (C. elegans)                                                    |
| 0.95                                            | 0.0038120000       | -3.234  | 220820_at   | NA        | NA                                                                                |
| 1.17                                            | 0.0038171000       | 3.234   | 201567_s_at | GOLGA4    | golgin A4                                                                         |
| 1.19                                            | 0.0038278000       | 3.232   | 223398_at   | C9orf89   | chromosome 9 open reading frame 89                                                |
| 1.05                                            | 0.0038482000       | 3.230   | 213580_at   | CREBZF    | CREB/ATF bZIP transcription factor                                                |
| 1.13                                            | 0.0038488000       | 3.230   | 242990_at   | NA        | NA                                                                                |
| 1.13                                            | 0.0038596000       | 3.229   | 221497_x_at | EGLN1     | egl nine homolog 1 (C. elegans)                                                   |
| 0.94                                            | 0.0038601000       | -3.229  | 219986_s_at | ACAD10    | acyl-CoA dehydrogenase family, member 10                                          |
| 0.96                                            | 0.0039270000       | -3.222  | 1570529_at  | KIAA0020  | KIAA0020                                                                          |
| 0.94                                            | 0.0039343000       | -3.221  | 239257_at   | MOV10L1   | Mov10l1, Moloney leukemia virus 10-like 1, homolog (mouse)                        |
| 0.94                                            | 0.0039403000       | -3.220  | 203695_s_at | DFNA5     | deafness, autosomal dominant 5                                                    |
| 1.04                                            | 0.0039565000       | 3.218   | 215564_at   | AREG      | amphiregulin                                                                      |
| 1.13                                            | 0.0039779000       | 3.216   | 1568780_at  | LOC649305 | hypothetical LOC649305                                                            |
| 1.14                                            | 0.0039901000       | 3.215   | 204507_s_at | PPP3R1    | protein phosphatase 3, regulatory subunit B, alpha                                |
| 0.95                                            | 0.0039918000       | -3.215  | 204685_s_at | ATP2B2    | ATPase, Ca <sup>++</sup> transporting, plasma membrane 2                          |
| 1.14                                            | 0.0040012000       | 3.214   | 232344_at   | NA        | NA                                                                                |
| 0.96                                            | 0.0040018000       | -3.214  | 207825_s_at | GHRHR     | growth hormone releasing hormone receptor                                         |
| 1.07                                            | 0.0040258000       | 3.211   | 243206_at   | NA        | NA                                                                                |
| 1.51                                            | 0.0040535000       | 3.208   | 232629_at   | PROK2     | prokineticin 2                                                                    |
| 0.97                                            | 0.0040686000       | -3.207  | 1552995_at  | IL27      | interleukin 27                                                                    |
| 0.96                                            | 0.0040774000       | -3.206  | 231986_at   | RIMS1     | regulating synaptic membrane exocytosis 1                                         |
| 1.18                                            | 0.0040817000       | 3.205   | 212112_s_at | STX12     | syntaxin 12                                                                       |
| 1.08                                            | 0.0040915000       | 3.204   | 1562848_at  | NA        | NA                                                                                |
| 0.95                                            | 0.0040956000       | -3.204  | 1567036_at  | C20orf181 | chromosome 20 open reading frame 181                                              |
| 0.97                                            | 0.0040998000       | -3.203  | 1556554_at  | TRIM50    | tripartite motif containing 50                                                    |
| 0.95                                            | 0.0041361000       | -3.200  | 1554203_at  | GRIK1-AS1 | GRIK1 antisense RNA 1 (non-protein coding)                                        |
| 0.96                                            | 0.0041515000       | -3.198  | 215697_at   | NA        | NA                                                                                |
| 1.06                                            | 0.0041522000       | 3.198   | 214928_at   | OBSL1     | obscurin-like 1                                                                   |
| 1.04                                            | 0.0041620000       | 3.197   | 216512_s_at | DCT       | dopachrome tautomerase (dopachrome delta-isomerase, tyrosine-related protein 2)   |
| 0.94                                            | 0.0041796000       | -3.195  | 237652_at   | NA        | NA                                                                                |
| 1.07                                            | 0.0042093000       | 3.192   | 1569940_at  | SLC6A16   | solute carrier family 6, member 16                                                |
| 1.15                                            | 0.0042305000       | 3.190   | 217552_x_at | CR1       | complement component (3b/4b) receptor 1 (Knops blood group)                       |
| 0.88                                            | 0.0042343000       | -3.190  | 227859_at   | DNAJC27   | DnaJ (Hsp40) homolog, subfamily C, member 27                                      |
| 0.92                                            | 0.0042437000       | -3.189  | 230449_x_at | NA        | NA                                                                                |
| 1.36                                            | 0.0042869000       | 3.184   | 200958_s_at | SDCBP     | syndecan binding protein (syntenin)                                               |
| 0.95                                            | 0.0044171000       | -3.172  | 223549_s_at | ESPN      | espin                                                                             |

**Supplementary Table 3 List of 306 probe-sets of the classifier that discriminates between initial and relapse AML samples, ranked according to *P*-value**

| Geometric mean of intensities relapse/diagnosis | Parametric p-value | t-value | ProbeSet     | Symbol   | Name                                                                                |
|-------------------------------------------------|--------------------|---------|--------------|----------|-------------------------------------------------------------------------------------|
| 0.95                                            | 0.0044683000       | -3.167  | 225587_at    | TMEM129  | transmembrane protein 129                                                           |
| 1.07                                            | 0.0045035000       | 3.163   | 222887_s_at  | TMEM127  | transmembrane protein 127                                                           |
| 1.48                                            | 0.0045083000       | 3.163   | 205633_s_at  | ALAS1    | aminolevulinate, delta-, synthase 1                                                 |
| 1.05                                            | 0.0045097000       | 3.163   | 221631_at    | CACNA11  | calcium channel, voltage-dependent, T type, alpha 11 subunit                        |
| 1.05                                            | 0.0045188000       | 3.162   | 235896_s_at  | SMCR7    | Smith-Magenis syndrome chromosome region, candidate 7                               |
| 1.11                                            | 0.0045202000       | 3.162   | 1555789_s_at | PHF23    | PHD finger protein 23                                                               |
| 0.96                                            | 0.0045433000       | -3.160  | 230317_x_at  | TMCO3    | transmembrane and coiled-coil domains 3                                             |
| 0.94                                            | 0.0045727000       | -3.157  | 212559_at    | PRKAR1B  | protein kinase, cAMP-dependent, regulatory, type I, beta                            |
| 0.95                                            | 0.0045990000       | -3.154  | 223801_s_at  | APOL4    | apolipoprotein L, 4                                                                 |
| 0.89                                            | 0.0046388000       | -3.151  | 221951_at    | TMEM80   | transmembrane protein 80                                                            |
| 1.06                                            | 0.0046455000       | 3.150   | 223255_at    | G2E3     | G2/M-phase specific E3 ubiquitin protein ligase                                     |
| 1.17                                            | 0.0046853000       | 3.147   | 210423_s_at  | SLC11A1  | solute carrier family 11 (proton-coupled divalent metal ion transporters), member 1 |
| 1.21                                            | 0.0046885000       | 3.146   | 203037_s_at  | MTSS1    | metastasis suppressor 1                                                             |
| 0.95                                            | 0.0046981000       | -3.145  | 237227_at    | NEK10    | NIMA (never in mitosis gene a)- related kinase 10                                   |
| 0.97                                            | 0.0046995000       | -3.145  | 234962_at    | NA       | NA                                                                                  |
| 1.13                                            | 0.0047098000       | 3.144   | 218364_at    | LRRFIP2  | leucine rich repeat (in FLII) interacting protein 2                                 |
| 0.96                                            | 0.0047219000       | -3.143  | 207669_at    | KRT83    | keratin 83                                                                          |
| 1.04                                            | 0.0047418000       | 3.141   | 203019_x_at  | SSX2IP   | synovial sarcoma, X breakpoint 2 interacting protein                                |
| 1.08                                            | 0.0047571000       | 3.140   | 239034_at    | CXorf24  | chromosome X open reading frame 24                                                  |
| 0.95                                            | 0.0047617000       | -3.140  | 234222_at    | NA       | NA                                                                                  |
| 0.94                                            | 0.0047672000       | -3.139  | 209767_s_at  | NA       | NA                                                                                  |
| 1.09                                            | 0.0047716000       | 3.139   | 230209_at    | ZXDC     | ZXD family zinc finger C                                                            |
| 0.92                                            | 0.0047739000       | -3.139  | 241633_x_at  | NA       | NA                                                                                  |
| 0.94                                            | 0.0047860000       | -3.137  | 235689_at    | MTFMT    | mitochondrial methionyl-tRNA formyltransferase                                      |
| 1.09                                            | 0.0048285000       | 3.134   | 229970_at    | NA       | NA                                                                                  |
| 1.03                                            | 0.0048365000       | 3.133   | 234589_at    | TMEM106A | transmembrane protein 106A                                                          |
| 1.08                                            | 0.0048917000       | 3.128   | 206613_s_at  | TAF1A    | TATA box binding protein (TBP)-associated factor, RNA polymerase I, A, 48kDa        |
| 1.06                                            | 0.0049048000       | 3.127   | 238548_at    | NA       | NA                                                                                  |
| 1.09                                            | 0.0049205000       | 3.126   | 1564064_a_at | ATP11B   | ATPase, class VI, type 11B                                                          |
| 1.07                                            | 0.0049364000       | 3.124   | 1562244_at   | ZNF578   | zinc finger protein 578                                                             |
| 1.3                                             | 0.0049636000       | 3.122   | 216942_s_at  | CD58     | CD58 molecule                                                                       |
