# Supplementary material for: Gene Expression Profiles Associated with Pediatric Relapsed AML
Source: PubMed Central journal article supplement (PMC4388534; doi:10.1371/journal.pone.0121730), 2015-04-07
Supplement: pone.0121730.s007.pdf [file pone.0121730.s007.pdf]

**Supplementary Table S4. Ingenuity transcription factor analysis output****Pair 1**

| Transcription Regulator   | p-value of overlap | Target molecules in dataset                                                |
|---------------------------|--------------------|----------------------------------------------------------------------------|
| CEBPA                     | 2.50E-06           | BTG1,CA2,CCND2,CXCR4,GATA2,ID2,KLRC1,LITAF,MPO,NFIL3,RAB31,SERPINB1,TUBB2A |
| SATB1                     | 3.18E-05           | ACTG1,CD69,HBB,HSP90AA1,HSPA8,NR4A2,PIK3IP1,PRKCB,SELL,SLC27A2,TSC22D3     |
| ELF4                      | 1.46E-04           | CA2,HDC,IL8,KIT,RAP1B                                                      |
| GATA2                     | 7.15E-04           | PECAM1,PRG2,RNASE2                                                         |
| GATA1                     | 1.11E-03           | HBB,LMO2,PRG2,RNASE2                                                       |
| CYLD                      | 2.33E-03           | IL8,JUN                                                                    |
| GTF2B                     | 2.33E-03           | NFKBIA,TNFAIP3                                                             |
| TAF4B                     | 4.58E-03           | NFKBIA,TNFAIP3                                                             |
| KLF2                      | 7.86E-03           | CCL3,IL8,SELL                                                              |
| GFI1                      | 1.32E-02           | IL6R,IL8,RB1                                                               |
| SP1                       | 1.41E-02           | CAT,HBB,HDC,KIT,PIM1                                                       |
| RELA                      | 1.48E-02           | IL8,KIT,NFKBIA,PTPN6                                                       |
| NFE2                      | 1.98E-02           | HBB,TXN (includes EG:116484)                                               |
| FOXP2                     | 2.82E-02           | HBB                                                                        |
| NR1H3                     | 2.82E-02           | ABCA1                                                                      |
| TFAP2A                    | 2.82E-02           | ABCA1                                                                      |
| HLTF                      | 2.82E-02           | HBB                                                                        |
| MED7 (includes EG:171285) | 2.82E-02           | TNFAIP3                                                                    |
| MTA2                      | 2.82E-02           | HBB                                                                        |
| MAFK                      | 2.82E-02           | TXN (includes EG:116484)                                                   |
| GTF3A                     | 2.82E-02           | PIM1                                                                       |
| BTG1                      | 2.82E-02           | NR3C1                                                                      |
| BACH1                     | 2.82E-02           | HBB                                                                        |
| MED21                     | 2.82E-02           | TNFAIP3                                                                    |
| KLF13                     | 2.82E-02           | CCL5                                                                       |
| MYC                       | 2.85E-02           | CCND2,HNRNPA1,HSP90AA1,NAP1L1,PMAIP1                                       |
| TBP                       | 3.07E-02           | NFKBIA,TNFAIP3                                                             |

| <b>Pair 2</b>            |                    |                                                                                                                                                                                                         |
|--------------------------|--------------------|---------------------------------------------------------------------------------------------------------------------------------------------------------------------------------------------------------|
| Transcription Regulator  | p-value of overlap | Target molecules in dataset                                                                                                                                                                             |
| CEBPA                    | 8.96E-07           | ACSL1,ALOX5AP,BCL2A1,BTG1,BTG2,CCND2,CXCR4,EXTL2,GCH1,GLIPR1,H1FX,HLA-B,ID2,ISG15,ITGAM (includes EG:16409),LITAF,MPO,NFIL3,PRTN3,PTPRC,RGS2 (includes EG:19735),S100A9,SERPINB1,SOD2,TANK,TUBB2A       |
| IRF7                     | 1.12E-06           | BCL2L13,CXCL10,DNAJA1,IFI44,IFI44L,IFIH1,IFIT1,IFIT2,IFIT3,IFNB1 (includes EG:15977),IRF1 (includes EG:16362),IRF9,ISG15,ISG20,MCL1,MX1,NAMPT,NMI,OASL,PELI1,PMAIP1,RIPK2,RSAD2,S100A8,TNFSF13B,ZC3HAV1 |
| IRF3                     | 1.21E-06           | ANXA4,CD58,IFI44,IFIT1,IFIT2,IFIT3,IFNB1 (includes EG:15977),ISG15,NR3C1,PMAIP1,RASA1,RSAD2,SORL1,TMPO,TNF                                                                                              |
| HMGB1                    | 4.94E-06           | CCL3,CCL4,CD58,CD83,HLA-DRB1,ICAM1,IL8,MRC1 (includes EG:100286774),TNF                                                                                                                                 |
| TBP                      | 7.91E-06           | BCL2,EIF4E,HLA-A,IER3,NFKBIA,TNF,TNFAIP3                                                                                                                                                                |
| MYC                      | 5.30E-05           | CCND2,CDK4,CDKN1A,CSDE1,DLEU2,EXOSC8,FTH1 (includes EG:14319),GADD45A,HNRNPA1,HSP90AA1,HSPH1,MTHFD1,PHB,PMAIP1,SKP2 (includes EG:27401),TFRC,TYMS                                                       |
| SATB1                    | 6.45E-04           | ACTG1,ACTN1,CEACAM1 (includes others),DNMT3A,ENOSF1,FAM129A,GADD45B,HBB,HSP90AA1,HSPA8,IRF7,NR4A2,PTGS2,RGS1,SELL,SGK1,TSC22D3,UHRF1,VPS37B                                                             |
| TLX1                     | 8.10E-04           | MCL1,MYB,MYCBP,NMI,PCNA                                                                                                                                                                                 |
| STAT3                    | 8.11E-04           | CD83,CXCL10,FCER1G,FOS,IRF1 (includes EG:16362),MCL1,PTGS2,SOCS3,STAT3,TIMP1,TNF,VCAN                                                                                                                   |
| GF11                     | 1.03E-03           | AZU1,CDKN1A,ELANE,ETS2,IL8,RB1,TNF                                                                                                                                                                      |
| TP53 (includes EG:22059) | 1.16E-03           | BCL2,BIRC5,CDKN1A,DHFR,EGFR,HSP90AB1,PCNA,SLC19A1,UNC5B,VCAN                                                                                                                                            |
| KLF2                     | 2.02E-03           | CCL3,CCL4,IL8,PTGS2,SELL,TNF                                                                                                                                                                            |
| JUN                      | 2.97E-03           | APP,CDK1,FTH1 (includes EG:14319),PTGS2,TNF,VEGFA                                                                                                                                                       |
| TAF4B                    | 3.49E-03           | IER3,NFKBIA,TNFAIP3                                                                                                                                                                                     |
| AHR                      | 4.21E-03           | CCNG2,CD38,CDKN1A,GADD45A,ITGAM (includes EG:16409),PPP1R15A                                                                                                                                            |
| RELA                     | 4.46E-03           | BCL2,IER3,IFNB1 (includes EG:15977),IL8,NFKB1,NFKBIA,PTGS2,TGFB1 (includes EG:21803),TNF                                                                                                                |
| BRCA1                    | 4.67E-03           | CCNB2,H2AFX,H3F3A/H3F3B,SFPQ                                                                                                                                                                            |
| RARA                     | 7.75E-03           | CD38,CDKN1A,JUP,RARA                                                                                                                                                                                    |
| MAX                      | 8.47E-03           | CCND2,CSDE1,DLEU2,GADD45A,MTHFD1                                                                                                                                                                        |
| SRF                      | 9.62E-03           | FOS,MCL1                                                                                                                                                                                                |
| ZFP36                    | 9.62E-03           | CDKN1A,FOS                                                                                                                                                                                              |
| HIF1A                    | 9.62E-03           | TGFB1 (includes EG:21803),VEGFA                                                                                                                                                                         |
| KAT2B                    | 9.62E-03           | PTGS2,TNF                                                                                                                                                                                               |
| ELK1                     | 9.62E-03           | FOS,MCL1                                                                                                                                                                                                |
| CEBPB                    | 1.31E-02           | ALOX5AP,IL8,MBP,PRG2,PRTN3,TNF                                                                                                                                                                          |

|                    |          |                                     |
|--------------------|----------|-------------------------------------|
| (includes EG:1051) |          |                                     |
| E2F1               | 1.50E-02 | CDK1,CDK4,TGFB1 (includes EG:21803) |
| GATA1              | 2.04E-02 | FCER1A,HBB,MBP,PRG2,RNASE2          |
| IRF8               | 2.40E-02 | BCL6,CCR7,CD83,ICAM1                |
| GTF2B              | 2.70E-02 | NFKBIA,TNFAIP3                      |
| ELF4               | 3.26E-02 | CBX1,CDKN1A,CREM,CXCL2,IL8          |
| CEBPE              | 3.62E-02 | ALOX5AP,ELANE,MBP                   |
| EP300              | 3.62E-02 | HSP90AB1,NR4A1,TNF                  |

---

**Pair 3**

| Transcription Regulator   | p-value of overlap | Target molecules in dataset                                                                        |
|---------------------------|--------------------|----------------------------------------------------------------------------------------------------|
| MYC                       | 2.48E-05           | APEX1,CDK4,CSDE1,HNRNPA1,HSP90AA1,HSPB1,NAP1L1,NBN,PHB,TFRC,TYMS,UCT                               |
| CEBPA                     | 1.52E-04           | ANXA1,BTG1,CEBPA,CSF3R,GLIPR1,H1FX,HLA-B,ITGAM (includes EG:16409),MPO,NFIL3,PRTN3,PTPRC,SOD2,TANK |
| SATB1                     | 8.18E-04           | ACTN1,HBB,HSP90AA1,HSPA8,IRF8,PTGES3,RGS1,RPLP0,RPLP1,TRIM22,TSC22D3,TUBA4A                        |
| BRCA1                     | 5.02E-03           | H2AFX,H3F3A/H3F3B,SFPQ                                                                             |
| RB1                       | 6.57E-03           | HIST1H2AB/HIST1H2AE,TGFB1 (includes EG:21803)                                                      |
| REL                       | 7.26E-03           | IER3,IL8,SOD2                                                                                      |
| GF11                      | 9.12E-03           | AZU1,CEBPA,ELANE,IL8                                                                               |
| TBP                       | 1.00E-02           | HLA-A,IER3,TNFAIP3                                                                                 |
| TAF4B                     | 1.27E-02           | IER3,TNFAIP3                                                                                       |
| CEBPD                     | 1.33E-02           | CSF3R,ITGAM (includes EG:16409),PRTN3                                                              |
| SPI1 (includes EG:20375)  | 2.53E-02           | CTSS,NCF1C,NCF2,PRTN3                                                                              |
| E2F1                      | 2.99E-02           | CDK4,TGFB1 (includes EG:21803)                                                                     |
| SP1                       | 3.32E-02           | ALOX5,CAT,GNAI2,HBB,MCL1,NCF2                                                                      |
| PPARA                     | 4.05E-02           | NCF1C,NCF2                                                                                         |
| AHR                       | 4.43E-02           | CASP8,CCNG2,ITGAM (includes EG:16409)                                                              |
| FOXN2                     | 4.76E-02           | HBB                                                                                                |
| HLTF                      | 4.76E-02           | HBB                                                                                                |
| PLAGL2                    | 4.76E-02           | NCF2                                                                                               |
| MED7 (includes EG:171285) | 4.76E-02           | TNFAIP3                                                                                            |
| MTA2                      | 4.76E-02           | HBB                                                                                                |
| KEAP1                     | 4.76E-02           | GNAI2                                                                                              |
| BACH1                     | 4.76E-02           | HBB                                                                                                |
| MED21                     | 4.76E-02           | TNFAIP3                                                                                            |

---

| <b>Pair 4</b>              |                    |                                                                                                                                                                         |
|----------------------------|--------------------|-------------------------------------------------------------------------------------------------------------------------------------------------------------------------|
| Transcription Regulator    | p-value of overlap | Target molecules in dataset                                                                                                                                             |
| CEBPA                      | 2.16E-07           | ACSL1,ANXA1,BCL2A1,BTG1,C3AR1,CD14,GCH1,GLIPR1,H1FX,HCAR3,HLA-B,ID2,IL1RN,LITAF,MPO,PTX3,RGS2 (includes EG:19735),S100A9,SERPINB1,SERPINF1,SOD2,TANK,TRIB1,TUBB2A,UBE2I |
| HMGB1                      | 1.82E-05           | CCL3,CCL4,CD83,ICAM1,IL1B,IL6,IL8,TNF                                                                                                                                   |
| STAT3                      | 2.15E-04           | CD83,FCER1G,FOS,IL6,IRF1 (includes EG:16362),MCL1,PTGS2,SOCS3,TIMP1,TNF,TNFRSF1B,VCAN                                                                                   |
| RELA                       | 3.69E-04           | IER3,IFNGR2,IL1B,IL1RN,IL8,NFKB1,NFKBIA,PTGS2,TLR2,TNF                                                                                                                  |
| TLX1                       | 4.12E-04           | MCL1,MYB,MYCBP,NMI,PCNA                                                                                                                                                 |
| TBP                        | 7.66E-04           | HLA-A,IER3,NFKBIA,TNF,TNFAIP3                                                                                                                                           |
| KLF2                       | 9.45E-04           | CCL3,CCL4,IL1B,IL8,PTGS2,TNF                                                                                                                                            |
| MYC                        | 1.55E-03           | CDKN1A,CYFIP2,EXOSC8,FTH1 (includes EG:14319),HIST1H4A (includes others),HNRNPA1,HSP90AA1,MTHFD1,NAP1L1,NCL,SERINC3,TMSB10/TMSB4X,TYMS                                  |
| TP53 (includes EG:22059)   | 1.66E-03           | CDKN1A,DHFR,EGFR,FAS,IL6,PCNA,RUNX1,TRIM22,VCAN                                                                                                                         |
| IRF8                       | 2.08E-03           | BCL6,CCR7,CD83,ICAM1,IL1B                                                                                                                                               |
| TAF4B                      | 2.29E-03           | IER3,NFKBIA,TNFAIP3                                                                                                                                                     |
| ELF4                       | 3.81E-03           | CBX1,CDKN1A,CXCL2,IL8,KLF4,RAP1B                                                                                                                                        |
| REL                        | 4.60E-03           | BCL2L11,IER3,IL8,SOD2                                                                                                                                                   |
| STAT1                      | 4.87E-03           | CD14,FOS,IL1B,IRF1 (includes EG:16362),ITGAX,PIM1,TNF                                                                                                                   |
| NR3C2 (includes EG:110784) | 5.35E-03           | ATP1B1,BCL2A1,BID                                                                                                                                                       |
| ATF2                       | 5.35E-03           | DUSP1,IL6,TNF                                                                                                                                                           |
| SRF                        | 7.20E-03           | FOS,MCL1                                                                                                                                                                |
| ZFP36                      | 7.20E-03           | CDKN1A,FOS                                                                                                                                                              |
| KAT2B                      | 7.20E-03           | PTGS2,TNF                                                                                                                                                               |
| ELK1                       | 7.20E-03           | FOS,MCL1                                                                                                                                                                |
| JUN                        | 8.63E-03           | APP,CDK1,FTH1 (includes EG:14319),PTGS2,TNF                                                                                                                             |
| NFKB1                      | 9.23E-03           | IER3,IFNGR2,IL1B,IL1RN,NFKB1,NFKBIA,TNF                                                                                                                                 |
| SP1                        | 9.62E-03           | CAT,CDKN1A,HIST1H4A (includes others),ITGAX,MAT2A,MCL1,PIM1,SOAT1,TLR2,TNF                                                                                              |
| CREBBP                     | 1.00E-02           | PTGS2,TLR2,TNF                                                                                                                                                          |
| SPI1 (includes EG:20375)   | 1.31E-02           | CSF2RB,CTSS,FLI1,IL1B,IL1RN,NCF1C                                                                                                                                       |
| SATB1                      | 1.44E-02           | CLEC2B,ENOSF1,EVI2A,GADD45B,HSP90AA1,HSPA8,IKZF1,PTGS2,RGS1,RPLP1,SGK1,TAOK1,TRIM22,UHRF1                                                                               |
| GF11                       | 1.47E-02           | CDKN1A,IL8,RB1,SERPINA1,TNF                                                                                                                                             |
| GTF2B                      | 2.04E-02           | NFKBIA,TNFAIP3                                                                                                                                                          |
| MZF1                       | 2.04E-02           | CD34,MYB                                                                                                                                                                |

|       |          |                        |
|-------|----------|------------------------|
| RORC  | 2.47E-02 | IL1B,IL6,TNF           |
| BRCA1 | 2.47E-02 | CCNB2,H3F3A/H3F3B,SFPQ |
| NR3C1 | 3.85E-02 | ANXA1,ATP1B1           |
| PPARG | 4.66E-02 | ABCA1,CTSL1,IL1B       |

---

**Pair 5**

| Transcription Regulator  | p-value of overlap | Target molecules in dataset                                                                                                  |
|--------------------------|--------------------|------------------------------------------------------------------------------------------------------------------------------|
| CEBPA                    | 8.67E-08           | ACSL1,BTG1,CAMP,CEBPA,CXCR4,GCH1,GGH,HLA-B,ID2,IFI27,ISG15,ITGAL,ITGAM (includes EG:16409),MPO,RAB31,S100A9,SOD2,TANK,THBD   |
| SATB1                    | 1.16E-05           | CD69,CEACAM1 (includes others),CLEC2B,CTSD,FAM129A,GATA3,HBB,HSP90AA1,IRF7,IRF8,RGS1,SELL,TRIM22,TUBA4A,XAF1                 |
| MYC                      | 2.48E-05           | APEX1,CCND3,CSDE1,FTH1 (includes EG:14319),HIST1H4A (includes others),HNRNPA1,HSP90AA1,HSPB1,ITGAL,SCPEP1,TMSB10/TMSB4X,TYMS |
| GATA1                    | 8.90E-05           | FCER1A,GATA3,HBB,LMO2,PRG2,RNASE2                                                                                            |
| GATA2                    | 1.58E-04           | GATA3,PECAM1,PRG2,RNASE2                                                                                                     |
| SP1                      | 5.95E-04           | ALOX5,CAMP,HBB,HIST1H4A (includes others),IFNGR1,ITGAX,MAT2A,NCF2,SOAT1                                                      |
| STAT3                    | 9.71E-04           | FCER1G,FCGR1A,FOS,LILRB2,LILRB4,TIMP1,TNFRSF1B,VCAN                                                                          |
| ELF1                     | 9.95E-04           | FCER1A,FCER1G,NCF2                                                                                                           |
| IRF3                     | 1.85E-03           | AHNAK,B4GALT5,CCL5,CD58,ISG15,RASA1,SORL1                                                                                    |
| HIF1A                    | 2.26E-03           | TGFB1 (includes EG:21803),VEGFA                                                                                              |
| TP53 (includes EG:22059) | 4.86E-03           | BIRC5,EGFR,HSP90AB1,PTEN,TRIM22,VCAN                                                                                         |
| JUND                     | 6.55E-03           | FTH1 (includes EG:14319),NCF2                                                                                                |
| STAT1                    | 6.84E-03           | FCGR1A,FOS,IRF7,IRF8,ITGAX                                                                                                   |
| KLF10                    | 1.27E-02           | GATA3,TGFB1 (includes EG:21803)                                                                                              |
| IRF7                     | 1.57E-02           | CCL5,DNAJA1,ISG15,MX1,NAMPT,PSME2,S100A8,TNFSF13B,TRIM22,XAF1                                                                |
| USF2                     | 2.05E-02           | B2M,GATA3                                                                                                                    |
| FOS                      | 2.05E-02           | FTH1 (includes EG:14319),NCF2                                                                                                |
| SPI1 (includes EG:20375) | 2.52E-02           | CTSS,NCF1C,NCF2,PTPN6                                                                                                        |
| USF1                     | 2.98E-02           | B2M,GATA3                                                                                                                    |
| JUNB                     | 2.98E-02           | FTH1 (includes EG:14319),NCF2                                                                                                |
| STAT5B                   | 2.98E-02           | BCL6,FOS                                                                                                                     |
| JUN                      | 3.77E-02           | FTH1 (includes EG:14319),NCF2,VEGFA                                                                                          |
| HMGB1                    | 3.77E-02           | CCL3,CD58,HLA-DRB1                                                                                                           |
| PPARA                    | 4.04E-02           | NCF1C,NCF2                                                                                                                   |
| AHR                      | 4.42E-02           | CCNG2,DUSP6,ITGAM (includes EG:16409)                                                                                        |
| FOXN2                    | 4.75E-02           | HBB                                                                                                                          |
| FOXO2                    | 4.75E-02           | PRKAR1A                                                                                                                      |

|        |          |                            |
|--------|----------|----------------------------|
| SPIC   | 4.75E-02 | FCGR2B                     |
| HLTF   | 4.75E-02 | HBB                        |
| PLAGL2 | 4.75E-02 | NCF2                       |
| HINFP  | 4.75E-02 | HIST1H4A (includes others) |
| TRIM28 | 4.75E-02 | S100A9                     |
| MTA2   | 4.75E-02 | HBB                        |
| RBPJ   | 4.75E-02 | CAMP                       |
| PIAS3  | 4.75E-02 | FTH1 (includes EG:14319)   |
| FOSB   | 4.75E-02 | FTH1 (includes EG:14319)   |
| BACH1  | 4.75E-02 | HBB                        |
| KLF5   | 4.75E-02 | BIRC5                      |
| KLF13  | 4.75E-02 | CCL5                       |

---

**Pair 6**

| Transcription Regulator | p-value of overlap | Target molecules in dataset                                                                |
|-------------------------|--------------------|--------------------------------------------------------------------------------------------|
| GATA1                   | 3.29E-05           | AHSP,ALAS2,GATA3,HBB,MBP,MPL,RNASE2                                                        |
| CEBPA                   | 1.70E-04           | ANXA1,BTG1,CEBPA,CSF3R,H1FX,HLA-B,ID2,ISG15,LST1,MPO,PTX3,S100A9,SERPINB1,SOD2,TANK,TUBB2A |
| SATB1                   | 2.06E-04           | CD69,CTNNA1,DSTYK,EVI2A,GATA3,HBB,HSPA8,NR4A2,PRKCB,RASGRP2,SELL,SGK1,TAOK1,TUBA4A,UBE2L6  |
| GFI1                    | 3.54E-03           | AZU1,CEBPA,ELANE,ETS2,RB1                                                                  |
| CEBPE                   | 9.82E-03           | CSF3R,ELANE,MBP                                                                            |
| EGR2                    | 1.05E-02           | CBLB,MBP                                                                                   |
| GTF2B                   | 1.05E-02           | NFKBIA,TNFAIP3                                                                             |
| IRF7                    | 1.28E-02           | CCL5,IFITM1,ISG15,NAMPT,PELI1,PSMB10,PSME1,PSME2,S100A8,TNFAIP8,TNFSF13B,UBE2L6            |
| TBP                     | 1.92E-02           | HLA-A,NFKBIA,TNFAIP3                                                                       |
| NOTCH3                  | 2.02E-02           | ID1,PTX3                                                                                   |
| KLF10                   | 2.02E-02           | GATA3,TGFB1 (includes EG:21803)                                                            |
| TAF4B                   | 2.02E-02           | NFKBIA,TNFAIP3                                                                             |
| NR3C1                   | 2.02E-02           | ANXA1,ATP1B1                                                                               |
| RUNX1T1                 | 3.23E-02           | CD34,ELANE                                                                                 |

---

**Pair 7**

| Transcription Regulator | p-value of overlap | Target molecules in dataset                                                           |
|-------------------------|--------------------|---------------------------------------------------------------------------------------|
| HMGB1                   | 7.29E-14           | CCL3,CCL4,CD58,CD83,CD86,HLA-DRB1,ICAM1,IL1B,IL6,IL8,MRC1 (includes EG:100286774),TNF |

|                           |          |                                                                                                                                                                                          |
|---------------------------|----------|------------------------------------------------------------------------------------------------------------------------------------------------------------------------------------------|
| CEBPA                     | 1.86E-12 | ACSL1,ANXA1,BCL2A1,BTG1,C3AR1,CD14,CXCR4,GLIPR1,H1FX,HCAR3,HLA-B,HMOX1,IL1RN,ISG15,ITGAM (includes EG:16409),NFIL3,PTPRC,RGS2 (includes EG:19735),S100A9,SERPINB1,SOD2,TANK,THBD,TNFSF10 |
| IRF7                      | 1.77E-11 | CARD16,CCL5,CXCL10,HERC5,IFI44,IFIT1,IFIT2,IFIT3,IFNB1 (includes EG:15977),IRF1 (includes EG:16362),ISG15,MCL1,MX1,NAMPT,OASL,PELI1,PMAIP1,RIPK2,S100A8,STAT1,TLR4,TNFAIP8,TNFSF10       |
| STAT3                     | 2.64E-10 | CD83,CD86,CXCL10,FCER1G,FOS,IL6,IRF1 (includes EG:16362),LILRB2,MCL1,PTGS2,SOCS3,TIMP1,TNF,TNFRSF1B,VCAN                                                                                 |
| IRF3                      | 3.97E-09 | ADAM9,B4GALT5,CCL5,CD58,IFI44,IFIT1,IFIT2,IFIT3,IFNB1 (includes EG:15977),ISG15,PMAIP1,SORL1,TNF                                                                                         |
| KLF2                      | 1.45E-06 | CCL3,CCL4,IL1B,IL8,PTGS2,SELL,TNF                                                                                                                                                        |
| SP1                       | 1.54E-06 | ALOX5,CAT,CDKN1A,HBB,IFNGR1,ITGAX,MCL1,NCF2,PIM1,SOAT1,TLR2,TNF                                                                                                                          |
| IRF8                      | 5.17E-06 | BCL6,CCR7,CD83,CD86,ICAM1,IL1B                                                                                                                                                           |
| STAT1                     | 1.03E-05 | CD14,FOS,IL1B,IRF1 (includes EG:16362),IRF8,ITGAX,PIM1,TNF                                                                                                                               |
| SPI1 (includes EG:20375)  | 5.50E-05 | CTSS,FLI1,IL1B,IL1RN,MBP,NCF1C,NCF2                                                                                                                                                      |
| AHR                       | 5.74E-05 | CCNG2,CDKN1A,DUSP6,FAS,ITGAM (includes EG:16409),PPP1R15A                                                                                                                                |
| RELA                      | 8.75E-05 | IER3,IFNB1 (includes EG:15977),IL1B,IL1RN,IL8,PTGS2,TLR2,TNF                                                                                                                             |
| MYC                       | 2.97E-04 | CDKN1A,CYFIP2,FTH1 (includes EG:14319),HSPB1,MDM2,NBN,NCL,PMAIP1,SCPEP1,TFRC                                                                                                             |
| REL                       | 3.89E-04 | BCL2L11,IER3,IL8,SOD2                                                                                                                                                                    |
| TP53 (includes EG:22059)  | 5.83E-04 | CASP1,CDKN1A,FAS,IL6,MDM2,RUNX1,VCAN                                                                                                                                                     |
| TBP                       | 6.26E-04 | EIF4E,IER3,TNF,TNFAIP3                                                                                                                                                                   |
| ATF2                      | 7.89E-04 | DUSP1,IL6,TNF                                                                                                                                                                            |
| GFI1                      | 8.56E-04 | CDKN1A,IL8,RB1,SERPINA1,TNF                                                                                                                                                              |
| CEBPD                     | 9.50E-04 | CD14,IL1B,ITGAM (includes EG:16409),ITGAX                                                                                                                                                |
| NFKB1                     | 1.40E-03 | IER3,IFNB1 (includes EG:15977),IL1B,IL1RN,TNF,TNFSF10                                                                                                                                    |
| CREBBP                    | 1.53E-03 | PTGS2,TLR2,TNF                                                                                                                                                                           |
| CEBPB (includes EG:1051)  | 1.82E-03 | CD14,IL1B,IL8,MBP,TNF                                                                                                                                                                    |
| SRF                       | 1.93E-03 | FOS,MCL1                                                                                                                                                                                 |
| ZFP36                     | 1.93E-03 | CDKN1A,FOS                                                                                                                                                                               |
| XBP1 (includes EG:140614) | 1.93E-03 | HLA-DRA,IL6                                                                                                                                                                              |
| KAT2B                     | 1.93E-03 | PTGS2,TNF                                                                                                                                                                                |
| KLF4                      | 1.93E-03 | CD14,ITGAM (includes EG:16409)                                                                                                                                                           |
| ELK1                      | 1.93E-03 | FOS,MCL1                                                                                                                                                                                 |
| PPARA                     | 2.59E-03 | ABCA1,NCF1C,NCF2                                                                                                                                                                         |

|                           |          |                                                             |
|---------------------------|----------|-------------------------------------------------------------|
| RORC                      | 4.00E-03 | IL1B,IL6,TNF                                                |
| SATB1                     | 4.37E-03 | GADD45B,HBB,HLA-DMB,IRF8,PTGS2,RGS1,SELL,SGK1,TAOK1,TSC22D3 |
| JUN                       | 4.40E-03 | FTH1 (includes EG:14319),NCF2,PTGS2,TNF                     |
| JUND                      | 5.61E-03 | FTH1 (includes EG:14319),NCF2                               |
| MZF1                      | 5.61E-03 | CD34,MYB                                                    |
| FOXO3                     | 5.61E-03 | BCL2L11,TNFSF10                                             |
| PPARG                     | 8.03E-03 | ABCA1,IL1B,TNFSF10                                          |
| ELF4                      | 8.44E-03 | CDKN1A,CXCL2,IL8,KLF4                                       |
| CREB1                     | 1.07E-02 | FOS,IL1B,TNF                                                |
| TAF4B                     | 1.09E-02 | IER3,TNFAIP3                                                |
| TP73                      | 1.09E-02 | CDKN1A,PMAIP1                                               |
| ELF1                      | 1.76E-02 | FCER1G,NCF2                                                 |
| EGR1                      | 1.76E-02 | EGR1,TNF                                                    |
| FOS                       | 1.76E-02 | FTH1 (includes EG:14319),NCF2                               |
| IRF5                      | 1.76E-02 | IL6,TNF                                                     |
| BCL6                      | 2.14E-02 | BCL2A1,PRDM1,SOCS3                                          |
| JUNB                      | 2.57E-02 | FTH1 (includes EG:14319),NCF2                               |
| STAT5B                    | 2.57E-02 | BCL6,FOS                                                    |
| VDR                       | 3.49E-02 | CD14,THBD                                                   |
| FOXN2                     | 4.39E-02 | HBB                                                         |
| HSF1 (includes EG:15499)  | 4.39E-02 | HSPA1A/HSPA1B                                               |
| NR1H3                     | 4.39E-02 | ABCA1                                                       |
| TFAP2A                    | 4.39E-02 | ABCA1                                                       |
| LITAF                     | 4.39E-02 | TNF                                                         |
| NFAT5                     | 4.39E-02 | TNF                                                         |
| HLTF                      | 4.39E-02 | HBB                                                         |
| PLAGL2                    | 4.39E-02 | NCF2                                                        |
| MED7 (includes EG:171285) | 4.39E-02 | TNFAIP3                                                     |
| TRIM28                    | 4.39E-02 | S100A9                                                      |
| MTA2                      | 4.39E-02 | HBB                                                         |
| PIAS3                     | 4.39E-02 | FTH1 (includes EG:14319)                                    |
| BCL3                      | 4.39E-02 | TNF                                                         |
| GTF3A                     | 4.39E-02 | PIM1                                                        |
| FOSB                      | 4.39E-02 | FTH1 (includes EG:14319)                                    |
| BACH1                     | 4.39E-02 | HBB                                                         |
| MED21                     | 4.39E-02 | TNFAIP3                                                     |
| NR1D1                     | 4.39E-02 | TLR4                                                        |
| SREBF2                    | 4.39E-02 | GTF2I                                                       |
| KLF13                     | 4.39E-02 | CCL5                                                        |



|       |          |                              |
|-------|----------|------------------------------|
| CEBPE | 4.52E-02 | CEBPB (includes EG:1051),MBP |
| EP300 | 4.52E-02 | TLR2,TNF                     |

---

**Pair 8**

| Transcription Regulator  | p-value of overlap | Target molecules in dataset                                                                                               |
|--------------------------|--------------------|---------------------------------------------------------------------------------------------------------------------------|
| CEBPA                    | 3.65E-08           | ANXA1,CSF3R,CXCR4,GLIPR1,H1FX,ICAM2,ID2,IFI27,MPO,MYC,RGS2 (includes EG:19735),S100A9,SERPINB1,SOD2,TANK,TRIB1,TUBB2A,VCL |
| IRF7                     | 6.26E-06           | CARD16,CCL5,IFI44,IFI44L,IFITM1,IFITM2,IFITM3,NMI,OAS3,PELI1,PMAIP1,PSMB9,S100A8,TNFSF13B,UBE2L6                          |
| SATB1                    | 1.61E-04           | CD69,CLEC2B,EPSTI1,EVI2A,FAM129A,HBB,HSP90AA1,HSPA8,RGS1,SELL,TSC22D3,UBE2L6                                              |
| FOXP3                    | 1.23E-03           | ANXA1,ID2,MAF,NT5E,RGS1                                                                                                   |
| CEBPB (includes EG:1051) | 1.23E-03           | CCND1,CSF3R,IL8,MYC,PRG2                                                                                                  |
| MYC                      | 2.93E-03           | CSDE1,HSP90AA1,HSPB1,MFAP1,NAP1L1,PMAIP1,SERINC3,TMSB10/TMSB4X                                                            |
| IRF3                     | 3.79E-03           | AHNAK,ANXA4,CCL5,IFI44,PMAIP1,SORL1                                                                                       |
| AHR                      | 4.05E-03           | CCNG2,DUSP6,JUN,MYC                                                                                                       |
| GATA1                    | 4.05E-03           | FCER1A,HBB,MPL,PRG2                                                                                                       |
| CYLD                     | 4.71E-03           | IL8,JUN                                                                                                                   |
| NR3C1                    | 9.17E-03           | ANXA1,ATP1B1                                                                                                              |
| ELF1                     | 1.49E-02           | FCER1A,FCER1G                                                                                                             |
| STAT5B                   | 2.17E-02           | CCND1,MAF                                                                                                                 |
| GATA2                    | 2.96E-02           | PECAM1,PRG2                                                                                                               |
| GFI1                     | 3.36E-02           | IL8,MYC,RB1                                                                                                               |
| CEBPE                    | 3.84E-02           | CSF3R,MYC                                                                                                                 |
| CTNNB1                   | 3.84E-02           | CCND1,MYC                                                                                                                 |
| FOXP2                    | 4.02E-02           | HBB                                                                                                                       |
| FOXD2                    | 4.02E-02           | PRKAR1A                                                                                                                   |
| HSF1 (includes EG:15499) | 4.02E-02           | HSPA1A/HSPA1B                                                                                                             |
| HLTF                     | 4.02E-02           | HBB                                                                                                                       |
| TRIM28                   | 4.02E-02           | S100A9                                                                                                                    |
| MTA2                     | 4.02E-02           | HBB                                                                                                                       |
| ENO1                     | 4.02E-02           | MYC                                                                                                                       |
| BACH1                    | 4.02E-02           | HBB                                                                                                                       |
| KLF13                    | 4.02E-02           | CCL5                                                                                                                      |
| REL                      | 4.81E-02           | IL8,SOD2                                                                                                                  |

| <b>Pair 9</b>              |                    |                                                                                                                                                     |
|----------------------------|--------------------|-----------------------------------------------------------------------------------------------------------------------------------------------------|
| Transcription Regulator    | p-value of overlap | Target molecules in dataset                                                                                                                         |
| CEBPA                      | 8.94E-11           | ACSL1,ANXA1,BCL2A1,BTG1,CXCR4,FOXO3,GCH1,GLIPR1,H1FX,HCAR3,ID2,IFI27,IL1RN,ISG15,LST1,MYC,NFIL3,PTX3,S100A9,SOD2,THBD,TNFSF10,TRD@,TUBB2A,UBE2I,VCL |
| HMGB1                      | 1.90E-06           | CCL3,CCL4,CD83,HLA-DRB1,ICAM1,IL1B,IL6,IL8                                                                                                          |
| IRF3                       | 2.03E-06           | ADAM9,AHNAK,ANXA4,B4GALT5,CCL5,IFIT3,ISG15,PLCG2,PMAIP1,RASA1,SORL1,TMPO                                                                            |
| TP53 (includes EG:22059)   | 4.17E-06           | BCL2,CASP1,CDKN1A,FAS,HSP90AB1,IL6,PCNA,PTEN,RUNX1,SLC19A1,VCAN                                                                                     |
| GFI1                       | 5.75E-06           | AZU1,CDKN1A,ELANE,ETS2,IL6R,IL8,MYC,RB1                                                                                                             |
| STAT3                      | 1.12E-05           | CD83,CXCL10,FCER1G,IL6,IRF1 (includes EG:16362),MCL1,MYC,SLAMF1,SOCS3,TIMP1,TNFRSF1B,VCAN                                                           |
| IRF7                       | 2.48E-05           | CCL5,CCNA1,CXCL10,IFIT3,IL4I1,IRF1 (includes EG:16362),ISG15,MCL1,MX1,NAMPT,OASL,PELI1,PMAIP1,PSMB8,RIPK2,S100A8,TNFAIP8,TNFSF10                    |
| TBP                        | 1.85E-04           | BCL2,IER3,MYC,NFKBIA,TNFAIP3                                                                                                                        |
| NFKB1                      | 3.04E-04           | IER3,IFNGR2,IL1B,IL1RN,NFKB1,NFKBIA,RELB,TNFSF10                                                                                                    |
| MYC                        | 3.44E-04           | APEX1,CAD,CDKN1A,FTH1 (includes EG:14319),HSP90AA1,MINA,MTHFD1,NBN,PMAIP1,SCPEP1,SERINC3,TFRC                                                       |
| IRF8                       | 5.23E-04           | BCL6,CCR7,CD83,ICAM1,IL1B                                                                                                                           |
| ELF4                       | 7.98E-04           | CBX1,CDKN1A,CXCL2,IL8,KLF4,MT1G                                                                                                                     |
| PML                        | 9.36E-04           | CCNA1,RARA,SPI1 (includes EG:20375)                                                                                                                 |
| TAF4B                      | 9.36E-04           | IER3,NFKBIA,TNFAIP3                                                                                                                                 |
| RELA                       | 9.73E-04           | BCL2,IER3,IFNGR2,IL1B,IL1RN,IL8,NFKB1,NFKBIA                                                                                                        |
| REL                        | 1.50E-03           | BCL2L11,IER3,IL8,SOD2                                                                                                                               |
| RARA                       | 1.50E-03           | CCNA1,CDKN1A,RARA,THBD                                                                                                                              |
| KLF2                       | 1.69E-03           | CCL3,CCL4,IL1B,IL8,SELL                                                                                                                             |
| NR3C2 (includes EG:110784) | 2.23E-03           | BCL2,BCL2A1,BID                                                                                                                                     |
| SPI1 (includes EG:20375)   | 3.02E-03           | ETS2,FLI1,IL1B,IL1RN,NCF1C,NCF2                                                                                                                     |
| XBP1 (includes EG:140614)  | 3.92E-03           | HLA-DRA,IL6                                                                                                                                         |
| CTCF (includes EG:10664)   | 3.92E-03           | HLA-DRB1,MYC                                                                                                                                        |
| SP1                        | 4.04E-03           | CAT,CDKN1A,HBB,IFNGR1,MAT2B,MCL1,NCF2,PIM1,SLC19A1                                                                                                  |
| PPARA                      | 7.10E-03           | ABCA1,NCF1C,NCF2                                                                                                                                    |
| SATB1                      | 7.19E-03           | CDK19,GADD45B,HBB,HSP90AA1,IKZF1,RGS1,SELL,SLC27A2,SPI1 (includes EG:20375),TAOK1,TSC22D3,UHRF1                                                     |
| CEBPE                      | 1.08E-02           | CEBPB (includes EG:1051),ELANE,MYC                                                                                                                  |

|                                |          |                                |
|--------------------------------|----------|--------------------------------|
| JUND                           | 1.13E-02 | FTH1 (includes EG:14319),NCF2  |
| GTF2B                          | 1.13E-02 | NFKBIA,TNFAIP3                 |
| FOXO3                          | 1.13E-02 | BCL2L11,TNFSF10                |
| TLX1                           | 1.55E-02 | MCL1,PCNA,RAF1                 |
| AHR                            | 1.89E-02 | CDKN1A,FAS,MYC,PPP1R15A        |
| PPARG                          | 2.11E-02 | ABCA1,IL1B,TNFSF10             |
| TP73                           | 2.16E-02 | CDKN1A,PMAIP1                  |
| SIN3A                          | 2.16E-02 | BCL2,HLA-DRA                   |
| RUNX1T1                        | 3.46E-02 | ELANE,SPI1 (includes EG:20375) |
| ELF1                           | 3.46E-02 | FCER1G,NCF2                    |
| FOXO1<br>(includes<br>EG:2308) | 3.46E-02 | BCL2L11,KLF2                   |
| FOS                            | 3.46E-02 | FTH1 (includes EG:14319),NCF2  |
| FOXP3                          | 3.90E-02 | ANXA1,ID2,NFIL3,RGS1           |
| CEBPB<br>(includes<br>EG:1051) | 3.90E-02 | FOXO3,IL1B,IL8,MYC             |
| JUNB                           | 4.97E-02 | FTH1 (includes EG:14319),NCF2  |

| <b>Pair 10</b>              |                    |                                                                                                                                   |
|-----------------------------|--------------------|-----------------------------------------------------------------------------------------------------------------------------------|
| Transcription Regulator     | p-value of overlap | Target molecules in dataset                                                                                                       |
| CEBPA                       | 3.51E-10           | ACSL1,ANXA1,BTG1,CD14,CXCR4,H1FX,ITGAM (includes EG:16409),LITAF,MPO,MYC,RAB31,RGS2 (includes EG:19735),S100A9,SOD2,TNFSF10,TRIB1 |
| STAT3                       | 3.76E-08           | CD83,FCER1G,FOS,LILRB2,MCL1,MYC,PTGS2,TIMP1,TNFRSF1B,VCAN                                                                         |
| AHR                         | 1.26E-06           | CASP8,CCNG2,ITGAM (includes EG:16409),JUN,MYC,PPP1R15A                                                                            |
| HMGB1                       | 3.73E-04           | CCL3,CD83,IL8,MRC1 (includes EG:100286774)                                                                                        |
| SRF                         | 5.07E-04           | FOS,MCL1                                                                                                                          |
| KLF4                        | 5.07E-04           | CD14,ITGAM (includes EG:16409)                                                                                                    |
| ELK1                        | 5.07E-04           | FOS,MCL1                                                                                                                          |
| SATB1                       | 7.09E-04           | ACTN1,CD69,CLEC2B,FAM129A,HBB,NR4A2,PTGS2,RGS1                                                                                    |
| CYLD                        | 1.50E-03           | IL8,JUN                                                                                                                           |
| CEBPD                       | 1.64E-03           | CD14,ITGAM (includes EG:16409),MYC                                                                                                |
| KLF2                        | 4.22E-03           | CCL3,IL8,PTGS2                                                                                                                    |
| GFI1                        | 7.21E-03           | IL8,MYC,SERPINA1                                                                                                                  |
| CEBPB<br>(includes EG:1051) | 1.12E-02           | CD14,IL8,MYC                                                                                                                      |
| NOTCH1                      | 1.30E-02           | ITGAM (includes EG:16409),MYC                                                                                                     |
| REL                         | 1.64E-02           | IL8,SOD2                                                                                                                          |
| STAT1                       | 2.01E-02           | CD14,FOS,PIM1                                                                                                                     |
| TBP                         | 2.02E-02           | MYC,TNFAIP3                                                                                                                       |
| IRF7                        | 2.14E-02           | IFI16,MCL1,PMAIP1,S100A8,TNFSF10,TNFSF13B                                                                                         |
| FOXP2                       | 2.25E-02           | HBB                                                                                                                               |
| FOXD2                       | 2.25E-02           | PRKAR1A                                                                                                                           |
| HLTF                        | 2.25E-02           | HBB                                                                                                                               |
| MED7 (includes EG:171285)   | 2.25E-02           | TNFAIP3                                                                                                                           |
| TRIM28                      | 2.25E-02           | S100A9                                                                                                                            |
| MTA2                        | 2.25E-02           | HBB                                                                                                                               |
| GTF3A                       | 2.25E-02           | PIM1                                                                                                                              |
| ENO1                        | 2.25E-02           | MYC                                                                                                                               |
| BACH1                       | 2.25E-02           | HBB                                                                                                                               |
| MED21                       | 2.25E-02           | TNFAIP3                                                                                                                           |
| SP1                         | 2.76E-02           | ALOX5,HBB,MCL1,PIM1                                                                                                               |
| NCOR2                       | 4.46E-02           | CD69                                                                                                                              |
| ZFP36                       | 4.46E-02           | FOS                                                                                                                               |
| PYCARD                      | 4.46E-02           | DUSP10                                                                                                                            |
| CDKN2A                      | 4.46E-02           | CCND3                                                                                                                             |

|                          |          |                           |
|--------------------------|----------|---------------------------|
| KAT2B                    | 4.46E-02 | PTGS2                     |
| FOXP1                    | 4.46E-02 | ITGAM (includes EG:16409) |
| KLF1                     | 4.46E-02 | HBB                       |
| CTCF (includes EG:10664) | 4.46E-02 | MYC                       |
| MYC                      | 4.86E-02 | CCND3,CDK4,MINA,PMAIP1    |
| JUN                      | 4.94E-02 | JUN,PTGS2                 |

---

**Pair 11**

| Transcription Regulator   | p-value of overlap | Target molecules in dataset                                                 |
|---------------------------|--------------------|-----------------------------------------------------------------------------|
| CEBPA                     | 9.95E-06           | BCL2A1,CA2,CXCR4,HLA-B,ID2,PRTN3,PTX3,RAB31,S100A9,SOD2                     |
| IRF7                      | 6.98E-05           | IFI44,IFI44L,IFIT3,IRF1 (includes EG:16362),MCL1,NAMPT,S100A8,STAT1,TNFAIP8 |
| SRF                       | 3.39E-04           | FOS,MCL1                                                                    |
| ELK1                      | 3.39E-04           | FOS,MCL1                                                                    |
| REL                       | 4.81E-04           | IER3,IL8,SOD2                                                               |
| SATB1                     | 1.05E-03           | CLEC2B,GADD45B,NR4A2,P2RY8,PTGS2,RGS1,SELL                                  |
| STAT3                     | 1.24E-03           | FOS,IRF1 (includes EG:16362),MCL1,PTGS2,SOCS3                               |
| KLF2                      | 2.40E-03           | IL8,PTGS2,SELL                                                              |
| GF11                      | 4.13E-03           | AZU1,ELANE,IL8                                                              |
| STAT5B                    | 4.84E-03           | BCL6,FOS                                                                    |
| HSF1 (includes EG:15499)  | 1.84E-02           | HSPA1A/HSPA1B                                                               |
| TRIM28                    | 1.84E-02           | S100A9                                                                      |
| RELA                      | 2.44E-02           | IER3,IL8,PTGS2                                                              |
| BCL6                      | 2.67E-02           | BCL2A1,SOCS3                                                                |
| RFX5                      | 3.66E-02           | HLA-DRA                                                                     |
| ZFP36                     | 3.66E-02           | FOS                                                                         |
| XBP1 (includes EG:140614) | 3.66E-02           | HLA-DRA                                                                     |
| KAT2B                     | 3.66E-02           | PTGS2                                                                       |
| ELF4                      | 4.72E-02           | CA2,IL8                                                                     |

---

**Pair 12**

| Transcription Regulator | p-value of overlap | Target molecules in dataset      |
|-------------------------|--------------------|----------------------------------|
| ELF4                    | 1.49E-06           | HDC,IL8,KIT,KLF4                 |
| GATA2                   | 4.28E-04           | PRG2,RNASE2                      |
| KLF2                    | 2.09E-03           | IL8,SELL                         |
| HMGB1                   | 2.38E-03           | IL8,MRC1 (includes EG:100286774) |
| GATA1                   | 2.69E-03           | PRG2,RNASE2                      |

|                                |          |                   |
|--------------------------------|----------|-------------------|
| CEBPB<br>(includes<br>EG:1051) | 4.11E-03 | IL8,PRG2          |
| ZBTB16                         | 9.14E-03 | KIT               |
| PRDM1                          | 9.14E-03 | LGALS1            |
| CEBPA                          | 9.45E-03 | GCH1,GLIPR1,RAB31 |
| RELA                           | 1.06E-02 | IL8,KIT           |
| CYLD                           | 1.37E-02 | IL8               |
| SP1                            | 2.28E-02 | HDC,KIT           |
| REL                            | 4.05E-02 | IL8               |

---

**Pair 13**

| Transcription Regulator      | p-value of overlap | Target molecules in dataset                                                       |
|------------------------------|--------------------|-----------------------------------------------------------------------------------|
| SATB1                        | 2.24E-04           | EVI2A,FAM129A,GADD45B,HBB,HSP90AA1,IKZF1,IRF8,P2RY8,PRKCB,RGS1,TAOK1,TSC22D3,WARS |
| TBP                          | 8.82E-04           | BCL2,HLA-A,MYC,TNFAIP3                                                            |
| E2F1                         | 1.98E-03           | APAF1,CDK1,TGFB1 (includes EG:21803)                                              |
| HIF1A                        | 2.31E-03           | TGFB1 (includes EG:21803),VEGFA                                                   |
| SP2                          | 6.70E-03           | GNAI2,MAT2A                                                                       |
| IRF3                         | 8.96E-03           | CCL5,CD58,NR3C1,PMAIP1,SORL1,TMPO                                                 |
| JUN                          | 3.88E-02           | CDK1,JUN,VEGFA                                                                    |
| IRF7                         | 4.12E-02           | CCL5,IFI16,IFI44L,IFITM1,NAMPT,PMAIP1,STAT1,TNFAIP8,TNFSF13B                      |
| AHR                          | 4.55E-02           | DUSP6,JUN,MYC                                                                     |
| FOXP2                        | 4.81E-02           | HBB                                                                               |
| FOXD2                        | 4.81E-02           | PRKAR1A                                                                           |
| HSF1 (includes<br>EG:15499)  | 4.81E-02           | HSPA1A/HSPA1B                                                                     |
| HLTF                         | 4.81E-02           | HBB                                                                               |
| MED7 (includes<br>EG:171285) | 4.81E-02           | TNFAIP3                                                                           |
| HINFP                        | 4.81E-02           | HIST1H4A (includes others)                                                        |
| MTA2                         | 4.81E-02           | HBB                                                                               |
| KEAP1                        | 4.81E-02           | GNAI2                                                                             |
| ENO1                         | 4.81E-02           | MYC                                                                               |
| BTG1                         | 4.81E-02           | NR3C1                                                                             |
| BACH1                        | 4.81E-02           | HBB                                                                               |
| MED21                        | 4.81E-02           | TNFAIP3                                                                           |
| KLF13                        | 4.81E-02           | CCL5                                                                              |

**Pair 14**

| Transcription Regulator  | p-value of overlap | Target molecules in dataset                                                                                            |
|--------------------------|--------------------|------------------------------------------------------------------------------------------------------------------------|
| SATB1                    | 1.68E-04           | ACTN1,CEACAM1 (includes others),CLEC2B,EVI2A,FAM129A,GADD45B,HBB,HSP90AA1,HSPA8,NR4A2,VPS37B,VTA1 (includes EG:292640) |
| TLX1                     | 2.82E-04           | MCL1,MYB,MYCBP,PCNA                                                                                                    |
| GATA1                    | 4.36E-04           | AHSP,HBB,LMO2,MBP,NFE2                                                                                                 |
| SRF                      | 1.63E-03           | FOS,MCL1                                                                                                               |
| ELK1                     | 1.63E-03           | FOS,MCL1                                                                                                               |
| TP53 (includes EG:22059) | 2.17E-03           | APAF1,BCL2,CASP1,HSP90AB1,PCNA,RUNX1                                                                                   |
| IRF3                     | 3.88E-03           | ADAM9,CCL5,CD58,IFIT2,NR3C1,TMPO                                                                                       |
| MZF1                     | 4.75E-03           | CD34,MYB                                                                                                               |
| CEBPA                    | 4.96E-03           | BTG1,BTG2,CXCR4,GJA1,H1FX,HLA-B,ICAM2,ID2,PTPRC,SOD2                                                                   |
| IRF7                     | 5.34E-03           | CCL5,CCNA1,DNAJA1,GBP3,IFI16,IFIT2,MCL1,PELI1,TNFAIP8,TNFSF13B                                                         |
| PML                      | 9.25E-03           | CCNA1,JUP                                                                                                              |
| E2F1                     | 2.19E-02           | APAF1,TGFB1 (includes EG:21803)                                                                                        |
| STAT5B                   | 2.19E-02           | BCL6,FOS                                                                                                               |
| RUNX1                    | 2.92E-02           | JUP,NFE2,RUNX1                                                                                                         |
| FOXN2                    | 4.04E-02           | HBB                                                                                                                    |
| FOXD2                    | 4.04E-02           | PRKAR1A                                                                                                                |
| HSF1 (includes EG:15499) | 4.04E-02           | HSPA1A/HSPA1B                                                                                                          |
| HLTF                     | 4.04E-02           | HBB                                                                                                                    |
| HINFP                    | 4.04E-02           | HIST1H4A (includes others)                                                                                             |
| MTA2                     | 4.04E-02           | HBB                                                                                                                    |
| PIAS3                    | 4.04E-02           | FTH1 (includes EG:14319)                                                                                               |
| FOSB                     | 4.04E-02           | FTH1 (includes EG:14319)                                                                                               |
| BTG1                     | 4.04E-02           | NR3C1                                                                                                                  |
| BACH1                    | 4.04E-02           | HBB                                                                                                                    |
| KLF13                    | 4.04E-02           | CCL5                                                                                                                   |
| RARA                     | 4.85E-02           | CCNA1,JUP                                                                                                              |

**Pair 15**

| Transcription Regulator | p-value of overlap | Target molecules in dataset                              |
|-------------------------|--------------------|----------------------------------------------------------|
| SATB1                   | 1.32E-06           | ACTN1,CLEC2B,HBB,HSPA8,NR4A2,PIK3IP1,RGS1,TRIM22,TSC22D3 |
| ELF4                    | 3.03E-06           | ABCB1,CA2,CXCL2,HDC,KLF4                                 |
| SRF                     | 1.58E-04           | FOS,MCL1                                                 |

|                           |          |                                                        |
|---------------------------|----------|--------------------------------------------------------|
| ELK1                      | 1.58E-04 | FOS,MCL1                                               |
| CEBPA                     | 1.95E-04 | ANXA1,CA2,GCH1,HCAR3,MPO,PTX3,RGS2 (includes EG:19735) |
| NOTCH3                    | 9.30E-04 | ID1,PTX3                                               |
| JUN                       | 9.74E-04 | ABCB1,APP,JUN                                          |
| TLX1                      | 5.35E-03 | MCL1,MYB                                               |
| FOXN2                     | 1.26E-02 | HBB                                                    |
| HLTF                      | 1.26E-02 | HBB                                                    |
| MED7 (includes EG:171285) | 1.26E-02 | TNFAIP3                                                |
| MTA2                      | 1.26E-02 | HBB                                                    |
| MBD1                      | 1.26E-02 | ABCB1                                                  |
| BACH1                     | 1.26E-02 | HBB                                                    |
| MED21                     | 1.26E-02 | TNFAIP3                                                |
| AHR                       | 1.89E-02 | CD38,JUN                                               |
| GATA1                     | 1.89E-02 | FCER1A,HBB                                             |
| GFI1                      | 2.11E-02 | AZU1,ELANE                                             |
| NFATC4                    | 2.50E-02 | APP                                                    |
| ZFP36                     | 2.50E-02 | FOS                                                    |
| MECP2                     | 2.50E-02 | ABCB1                                                  |
| KLF1                      | 2.50E-02 | HBB                                                    |
| KLF6                      | 2.50E-02 | COL1A1                                                 |
| SP1                       | 2.63E-02 | HBB,HDC,MCL1                                           |
| FOXP3                     | 2.83E-02 | ANXA1,RGS1                                             |
| IRF7                      | 3.30E-02 | IFI44,IFIT3,MCL1,TRIM22                                |
| CYLD                      | 3.73E-02 | JUN                                                    |
| GTF2B                     | 3.73E-02 | TNFAIP3                                                |
| MZF1                      | 3.73E-02 | MYB                                                    |
| STAT5A                    | 3.73E-02 | FOS                                                    |
| SMARCA4                   | 3.73E-02 | HBB                                                    |
| TAF4B                     | 4.94E-02 | TNFAIP3                                                |
| NR3C1                     | 4.94E-02 | ANXA1                                                  |

---

**Pair 16**

| Transcription Regulator | p-value of overlap | Target molecules in dataset                                                                                                                                |
|-------------------------|--------------------|------------------------------------------------------------------------------------------------------------------------------------------------------------|
| CEBPA                   | 1.02E-05           | BTG1,BTG2,CCND2,CEBPA,CXCR4,FOXO3,GATA2,H1FX,ICAM2,ID2,LITAF,LYL1,MPO,MYC,PRTN3,PTPRC,RGS2 (includes EG:19735),S100A9,SERPINB1,SOD2,TANK,TNFSF10,TRIB1,VCL |
| GFI1                    | 1.46E-04           | CEBPA,ELANE,GFI1B,IL6R,IL8,MYC,RB1,SERPINA1                                                                                                                |
| SATB1                   | 1.45E-03           | ACTN1,CDK19,CLEC2B,DNMT3A,FAM129A,FAM65B,GADD45B,HSP90AA1,HSPA8,IKZF1,ILF3,NR4A2,P2RY8,PTGS2,RGS1,TAOK1,VTA1 (includes EG:292640),XAF1                     |



|                          |          |                                                                                                                         |
|--------------------------|----------|-------------------------------------------------------------------------------------------------------------------------|
| SPI1 (includes EG:20375) | 6.56E-03 | CSF2RB,CTSS,FLI1,MBP,NCF4,PRTN3,PTPN6                                                                                   |
| ELF4                     | 7.68E-03 | CXCL2,IL8,KIT,PIK3C3,RAP1B,TAF7                                                                                         |
| IRF3                     | 9.54E-03 | AHNAK,B4GALT5,CCL5,NR3C1,PIK3C3,PMAIP1,RASA1,SORL1,TMPO                                                                 |
| SRF                      | 9.56E-03 | FOS,MCL1                                                                                                                |
| CDKN2A                   | 9.56E-03 | CCND3,NR3C1                                                                                                             |
| ELK1                     | 9.56E-03 | FOS,MCL1                                                                                                                |
| TBP                      | 1.18E-02 | BCL2,MYC,NFKBIA,TNFAIP3                                                                                                 |
| MYC                      | 1.39E-02 | CCND2,CCND3,DLEU2,GADD45A,HIST1H4A (includes others),HSP90AA1,HSPH1,LAMP2,MFAP1,PMAIP1,SERINC3,SKP2 (includes EG:27401) |
| IRF7                     | 2.35E-02 | ADAR,CCL5,GBP3,IFI16,MCL1,NAMPT,PELI1,PMAIP1,S100A8,STAT1,STAT2,TNFAIP8,TNFSF10,TNFSF13B,TRIM5,XAF1                     |
| CYLD                     | 2.68E-02 | IL8,JUN                                                                                                                 |
| SP2                      | 2.68E-02 | MAT2A,MAT2B                                                                                                             |
| GTF2B                    | 2.68E-02 | NFKBIA,TNFAIP3                                                                                                          |
| SMAD4                    | 2.68E-02 | INPP5D,IRAK3                                                                                                            |
| MZF1                     | 2.68E-02 | MS4A2,MYB                                                                                                               |
| CEBPE                    | 3.59E-02 | ELANE,MBP,MYC                                                                                                           |
| CEBPB (includes EG:1051) | 4.80E-02 | FOXO3,IL8,MBP,MYC,PRTN3                                                                                                 |

---

**Pair 17**

| Transcription Regulator  | p-value of overlap | Target molecules in dataset                                                                                      |
|--------------------------|--------------------|------------------------------------------------------------------------------------------------------------------|
| CEBPA                    | 2.64E-12           | ANXA1,ARG1,BTG2,CAMP,CD14,CHI3L1,GBP1,HCAR3,HLA-B,ID2,ITGAL,LTF,PRTN3,PTX3,RGS2 (includes EG:19735),TRIB1,TUBB2A |
| MYC                      | 1.99E-05           | DDIT3,FTH1 (includes EG:14319),HSP90AA1,HSPB1,HSPH1,ITGAL,MIR17HG,PMAIP1                                         |
| RELA                     | 3.99E-05           | IL1B,IL8,MMP9,NFKBIA,PTPN6,TGFB1 (includes EG:21803)                                                             |
| HMGB1                    | 1.99E-04           | CCL3,CD83,IL1B,IL8                                                                                               |
| GF11                     | 3.24E-04           | AZU1,ELANE,IL8,SERPINA1                                                                                          |
| ELF4                     | 4.05E-04           | IL8,KLF4,MANF,PRF1                                                                                               |
| IRF7                     | 5.04E-04           | DNAJA1,GBP1,IFITM1,MX1,NAMPT,PELI1,PMAIP1,STAT1                                                                  |
| CEBPB (includes EG:1051) | 6.06E-04           | CD14,IL1B,IL8,PRTN3                                                                                              |
| CEBPD                    | 1.02E-03           | CD14,IL1B,PRTN3                                                                                                  |
| SPI1 (includes EG:20375) | 1.03E-03           | CHI3L1,IL1B,PRTN3,PTPN6                                                                                          |
| CYLD                     | 1.08E-03           | IL8,JUN                                                                                                          |
| GTF2B                    | 1.08E-03           | NFKBIA,TNFAIP3                                                                                                   |
| RB1                      | 1.08E-03           | HIST1H2AB/HIST1H2AE,TGFB1 (includes EG:21803)                                                                    |

|                           |          |                                                                |
|---------------------------|----------|----------------------------------------------------------------|
| SATB1                     | 1.29E-03 | CD69,GADD45B,HSP90AA1,HSPA8,RGS1,SGK1,SPI1 (includes EG:20375) |
| IRF8                      | 1.34E-03 | BCL6,CD83,IL1B                                                 |
| NOTCH3                    | 2.13E-03 | ID1,PTX3                                                       |
| TAF4B                     | 2.13E-03 | NFKBIA,TNFAIP3                                                 |
| NFKB1                     | 2.13E-03 | IL1B,MMP9,NFKBIA,PTPN6                                         |
| KLF2                      | 2.66E-03 | CCL3,IL1B,IL8                                                  |
| RUNX1T1                   | 3.51E-03 | ELANE,SPI1 (includes EG:20375)                                 |
| RUNX1                     | 3.86E-03 | CHI3L1,ITGAL,SPI1 (includes EG:20375)                          |
| FOXP3                     | 7.13E-03 | ANXA1,ID2,RGS1                                                 |
| CEBPE                     | 9.45E-03 | ELANE,LTF                                                      |
| PPARG                     | 1.48E-02 | IL1B,MMP9                                                      |
| TBP                       | 1.48E-02 | NFKBIA,TNFAIP3                                                 |
| SP1                       | 1.62E-02 | CAMP,CHI3L1,GNAI2,MMP9                                         |
| NFE2L2                    | 1.79E-02 | FTH1 (includes EG:14319),GNAI2                                 |
| HSF1 (includes EG:15499)  | 1.91E-02 | HSPA1A/HSPA1B                                                  |
| MED7 (includes EG:171285) | 1.91E-02 | TNFAIP3                                                        |
| RBPJ                      | 1.91E-02 | CAMP                                                           |
| PIAS3                     | 1.91E-02 | FTH1 (includes EG:14319)                                       |
| NKX3-1                    | 1.91E-02 | MIR17HG                                                        |
| BCLAF1                    | 1.91E-02 | TP53 (includes EG:22059)                                       |
| KEAP1                     | 1.91E-02 | GNAI2                                                          |
| NOTCH2                    | 1.91E-02 | FCER2                                                          |
| FOSB                      | 1.91E-02 | FTH1 (includes EG:14319)                                       |
| TCF7L2                    | 1.91E-02 | CD4                                                            |
| MED21                     | 1.91E-02 | TNFAIP3                                                        |
| SP3                       | 2.85E-02 | CHI3L1,GNAI2                                                   |
| JUN                       | 3.66E-02 | FTH1 (includes EG:14319),JUN                                   |
| NCOR2                     | 3.79E-02 | CD69                                                           |
| RUNX3                     | 3.79E-02 | ITGAL                                                          |
| HIF1A                     | 3.79E-02 | TGFB1 (includes EG:21803)                                      |
| HES1 (includes EG:15205)  | 3.79E-02 | CD4                                                            |
| PYCARD                    | 3.79E-02 | IL1B                                                           |
| KLF4                      | 3.79E-02 | CD14                                                           |
| NFKBIB                    | 3.79E-02 | GNAI2                                                          |
| HLF                       | 3.79E-02 | LMO2                                                           |
| AHR                       | 4.10E-02 | DUSP6,JUN                                                      |

**Pair 18**

| Transcription Regulator | p-value of overlap | Target molecules in dataset                                              |
|-------------------------|--------------------|--------------------------------------------------------------------------|
| HMGB1                   | 7.81E-06           | CCL3,CCL4,HLA-DRB1,ICAM1,IL1B,IL8,TNF                                    |
| KLF2                    | 6.64E-05           | CCL3,CCL4,IL1B,IL8,SELL,TNF                                              |
| TBP                     | 7.76E-05           | BCL2,IER3,NFKBIA,TNF,TNFAIP3                                             |
| TAF4B                   | 5.46E-04           | IER3,NFKBIA,TNFAIP3                                                      |
| RELA                    | 1.61E-03           | BCL2,IER3,IL1B,IL8,LTB,NFKBIA,TNF                                        |
| SATB1                   | 1.65E-03           | ACTG1,ACTN1,CLEC2B,EVI2A,FAM129A,GADD45B,HBB,PRKCB,PTGES3,RGS1,SELL,XAF1 |
| GF11                    | 1.86E-03           | CDKN1A,CEBPA,IL8,RB1,TNF                                                 |
| ELF4                    | 2.42E-03           | CDKN1A,CXCL2,IL8,KLF4,TAF7                                               |
| ZFP36                   | 2.72E-03           | CDKN1A,FOS                                                               |
| CDKN2A                  | 2.72E-03           | CCND3,NR3C1                                                              |
| NFKB1                   | 3.37E-03           | IER3,IL1B,ITPR1,LTB,NFKBIA,TNF                                           |
| FOXP3                   | 3.88E-03           | ANXA1,CYSLTR1,ID2,NFIL3,RGS1                                             |
| CYLD                    | 7.89E-03           | IL8,JUN                                                                  |
| GTF2B                   | 7.89E-03           | NFKBIA,TNFAIP3                                                           |
| HSF2                    | 7.89E-03           | HSPA1A/HSPA1B,TXN (includes EG:116484)                                   |
| REL                     | 9.41E-03           | IER3,IL8,SOD2                                                            |
| AHR                     | 1.02E-02           | CCNG2,CDKN1A,DUSP6,JUN                                                   |
| SIN3A                   | 1.52E-02           | BCL2,HLA-DRA                                                             |
| CREB1                   | 1.71E-02           | FOS,IL1B,TNF                                                             |
| EGR1                    | 2.45E-02           | EGR1,TNF                                                                 |
| ATF2                    | 2.45E-02           | DUSP1,TNF                                                                |

**Pair 19**

| Transcription Regulator        | p-value of overlap | Target molecules in dataset                                             |
|--------------------------------|--------------------|-------------------------------------------------------------------------|
| CEBPA                          | 6.59E-07           | ANXA1,DYNLT3,FOXO3,HCAR3,ID2,LITAF,PRTN3,PTX3,S100A9,SERPINB1,TRIB1     |
| IRF7                           | 7.33E-07           | IFITM1,IFITM2,ISG20,MCL1,NAMPT,PELI1,PMAIP1,RIPK2,S100A8,STAT1,TNFSF13B |
| TAF4B                          | 1.95E-05           | IER3,NFKBIA,TNFAIP3                                                     |
| CEBPB<br>(includes<br>EG:1051) | 2.29E-05           | FOXO3,IL1B,IL8,PRG2,PRTN3                                               |
| HMGB1                          | 1.30E-04           | CCL3,CD83,IL1B,IL8                                                      |
| GATA1                          | 1.67E-04           | HBB,LMO2,PRG2,RNASE2                                                    |
| RELA                           | 2.62E-04           | IER3,IL1B,IL8,NFKBIA,PTPN6                                              |
| PYCARD                         | 2.91E-04           | DUSP10,IL1B                                                             |
| TBP                            | 5.43E-04           | IER3,NFKBIA,TNFAIP3                                                     |

|                           |          |                              |
|---------------------------|----------|------------------------------|
| GTF2B                     | 8.64E-04 | NFKBIA,TNFAIP3               |
| NFKB1                     | 1.42E-03 | IER3,IL1B,NFKBIA,PTPN6       |
| KLF2                      | 1.93E-03 | CCL3,IL1B,IL8                |
| AHR                       | 2.82E-03 | CCNG2,CD38,DUSP6             |
| GFI1                      | 3.34E-03 | AZU1,ELANE,IL8               |
| GATA2                     | 5.78E-03 | PRG2,RNASE2                  |
| NFE2                      | 7.62E-03 | HBB,TXN (includes EG:116484) |
| SPI1 (includes EG:20375)  | 7.68E-03 | IL1B,PRTN3,PTPN6             |
| REL                       | 9.69E-03 | IER3,IL8                     |
| CEBPD                     | 1.45E-02 | IL1B,PRTN3                   |
| FOXP2                     | 1.71E-02 | HBB                          |
| HLTF                      | 1.71E-02 | HBB                          |
| MED7 (includes EG:171285) | 1.71E-02 | TNFAIP3                      |
| TRIM28                    | 1.71E-02 | S100A9                       |
| MTA2                      | 1.71E-02 | HBB                          |
| MAFK                      | 1.71E-02 | TXN (includes EG:116484)     |
| BTG1                      | 1.71E-02 | NR3C1                        |
| BACH1                     | 1.71E-02 | HBB                          |
| MED21                     | 1.71E-02 | TNFAIP3                      |
| IRF8                      | 1.72E-02 | CD83,IL1B                    |
| SRF                       | 3.39E-02 | MCL1                         |
| NFATC4                    | 3.39E-02 | APP                          |
| CDKN2A                    | 3.39E-02 | NR3C1                        |
| KLF1                      | 3.39E-02 | HBB                          |
| KLF6                      | 3.39E-02 | COL1A1                       |
| PRDM1                     | 3.39E-02 | LGALS1                       |
| HLF                       | 3.39E-02 | LMO2                         |
| ELK1                      | 3.39E-02 | MCL1                         |
| STAT3                     | 3.92E-02 | CD83,MCL1,TIMP1              |
| ELF4                      | 4.12E-02 | CXCL2,IL8                    |
| FOXP3                     | 4.94E-02 | ANXA1,ID2                    |

---

**Pair 20**

| Transcription Regulator | p-value of overlap | Target molecules in dataset                                              |
|-------------------------|--------------------|--------------------------------------------------------------------------|
| HMGB1                   | 9.24E-10           | CCL3,CCL4,CD83,ICAM1,IL1B,IL8,MRC1 (includes EG:100286774)               |
| CEBPA                   | 7.78E-07           | ACSL1,ANXA1,BCL2A1,CA2,GCH1,IL1RN,MPO,PTX3,RGS2 (includes EG:19735),SOD2 |
| KLF2                    | 1.31E-06           | CCL3,CCL4,IL1B,IL8,PTGS2                                                 |
| RELA                    | 6.46E-06           | IER3,IL1B,IL1RN,IL8,NFKBIA,PTGS2                                         |

|                                |          |                                                    |
|--------------------------------|----------|----------------------------------------------------|
| TAF4B                          | 1.04E-05 | IER3,NFKBIA,TNFAIP3                                |
| IRF8                           | 1.63E-05 | BCL6,CD83,ICAM1,IL1B                               |
| STAT3                          | 3.02E-05 | CD83,FOS,IRF1 (includes EG:16362),MCL1,PTGS2,SOCS3 |
| NFKB1                          | 4.44E-05 | IER3,IL1B,IL1RN,ITPR1,NFKBIA                       |
| SRF                            | 1.91E-04 | FOS,MCL1                                           |
| ELK1                           | 1.91E-04 | FOS,MCL1                                           |
| REL                            | 2.08E-04 | IER3,IL8,SOD2                                      |
| TBP                            | 2.94E-04 | IER3,NFKBIA,TNFAIP3                                |
| SPI1 (includes<br>EG:20375)    | 3.08E-04 | CTSS,ETS2,IL1B,IL1RN                               |
| GTF2B                          | 5.69E-04 | NFKBIA,TNFAIP3                                     |
| ELF4                           | 2.16E-03 | CA2,CXCL2,IL8                                      |
| STAT5B                         | 2.77E-03 | BCL6,FOS                                           |
| STAT1                          | 5.40E-03 | FOS,IL1B,IRF1 (includes EG:16362)                  |
| CREB1                          | 9.69E-03 | FOS,IL1B                                           |
| IRF7                           | 1.08E-02 | IRF1 (includes EG:16362),MCL1,NAMPT,PELI1,RIPK2    |
| FOXN2                          | 1.39E-02 | HBB                                                |
| HSF1 (includes<br>EG:15499)    | 1.39E-02 | HSPA1A/HSPA1B                                      |
| HLTF                           | 1.39E-02 | HBB                                                |
| MED7 (includes<br>EG:171285)   | 1.39E-02 | TNFAIP3                                            |
| MTA2                           | 1.39E-02 | HBB                                                |
| FOXD1                          | 1.39E-02 | CSNK1A1                                            |
| BACH1                          | 1.39E-02 | HBB                                                |
| MED21                          | 1.39E-02 | TNFAIP3                                            |
| BCL6                           | 1.56E-02 | BCL2A1,SOCS3                                       |
| GATA1                          | 2.27E-02 | HBB,RNASE2                                         |
| GFI1                           | 2.53E-02 | ETS2,IL8                                           |
| NFATC4                         | 2.75E-02 | ITPR1                                              |
| ZFP36                          | 2.75E-02 | FOS                                                |
| PYCARD                         | 2.75E-02 | IL1B                                               |
| KAT2B                          | 2.75E-02 | PTGS2                                              |
| KLF1                           | 2.75E-02 | HBB                                                |
| KLF6                           | 2.75E-02 | COL1A1                                             |
| SATB1                          | 3.16E-02 | GADD45B,HBB,HSP90AA1,PTGS2                         |
| SP1                            | 3.37E-02 | HBB,IFNGR1,MCL1                                    |
| CEBPB<br>(includes<br>EG:1051) | 3.38E-02 | IL1B,IL8                                           |
| CYLD                           | 4.10E-02 | IL8                                                |

|         |          |                     |
|---------|----------|---------------------|
| RB1     | 4.10E-02 | HIST1H2AB/HIST1H2AE |
| STAT5A  | 4.10E-02 | FOS                 |
| HSF2    | 4.10E-02 | HSPA1A/HSPA1B       |
| SMARCA4 | 4.10E-02 | HBB                 |

---

**Pair 21**

| Transcription Regulator     | p-value of overlap | Target molecules in dataset                                                                                               |
|-----------------------------|--------------------|---------------------------------------------------------------------------------------------------------------------------|
| CEBPA                       | 9.49E-13           | ACSL1,ANXA1,BCL2A1,BTG1,CA2,CXCR4,GBP1,GCH1,H1FX,ID2,IL1RN,ISG15,MPO,PTX3,RAB31,RGS2 (includes EG:19735), SOD2,TNFSF10    |
| IRF7                        | 1.29E-11           | CCNA1,GBP1,IFI44,IFIH1,IFIT1,IFIT2,IFIT3,IRF1 (includes EG:16362),ISG15,NAMPT,OAS3,OASL,PELI1,PMAIP1,RIPK2,STAT1, TNFSF10 |
| HMGB1                       | 1.59E-08           | CCL3,CCL4,CD83,ICAM1,IL1A,IL1B,IL6                                                                                        |
| STAT3                       | 3.07E-06           | CD83,FOS,IL6,IRF1 (includes EG:16362),PTGS2,PTPN2,SOCS3,VCAN                                                              |
| IRF3                        | 1.18E-05           | GBP1,IFI44,IFIT1,IFIT2,IFIT3,ISG15,PMAIP1                                                                                 |
| NFKB1                       | 2.52E-05           | IER3,IL1B,IL1RN,ITPR1,NFKBIA,TNFSF10                                                                                      |
| TAF4B                       | 3.56E-05           | IER3,NFKBIA,TNFAIP3                                                                                                       |
| RELA                        | 6.52E-05           | IER3,IL1A,IL1B,IL1RN,NFKBIA,PTGS2                                                                                         |
| STAT1                       | 1.77E-04           | FOS,IL1B,IRF1 (includes EG:16362),IRF7,IRF8                                                                               |
| KLF2                        | 2.13E-04           | CCL3,CCL4,IL1B,PTGS2                                                                                                      |
| REL                         | 6.91E-04           | BCL2L11,IER3,SOD2                                                                                                         |
| TBP                         | 9.72E-04           | IER3,NFKBIA,TNFAIP3                                                                                                       |
| GTF2B                       | 1.29E-03           | NFKBIA,TNFAIP3                                                                                                            |
| FOXO3                       | 1.29E-03           | BCL2L11,TNFSF10                                                                                                           |
| IRF8                        | 1.73E-03           | CD83,ICAM1,IL1B                                                                                                           |
| SATB1                       | 2.14E-03           | CD69,GADD45B,HSP90AA1,IRF7,IRF8,PTGS2,TSC22D3                                                                             |
| FOXO1<br>(includes EG:2308) | 4.17E-03           | BCL2L11,KLF2                                                                                                              |
| ATF2                        | 4.17E-03           | DUSP1,IL6                                                                                                                 |
| TP53 (includes EG:22059)    | 5.29E-03           | IL1A,IL6,PCNA,VCAN                                                                                                        |
| TAL1                        | 5.72E-03           | IL10RA,NR4A3,SERPINB2,TTC3,ZC3H12A                                                                                        |
| RORC                        | 1.12E-02           | IL1B,IL6                                                                                                                  |
| PPARG                       | 1.75E-02           | IL1B,TNFSF10                                                                                                              |
| FOXD2                       | 2.09E-02           | PRKAR1A                                                                                                                   |
| HSF1 (includes EG:15499)    | 2.09E-02           | HSPA1A/HSPA1B                                                                                                             |
| MED7 (includes EG:171285)   | 2.09E-02           | TNFAIP3                                                                                                                   |
| FOXD1                       | 2.09E-02           | CSNK1A1                                                                                                                   |
| MED21                       | 2.09E-02           | TNFAIP3                                                                                                                   |

|                              |          |                      |
|------------------------------|----------|----------------------|
| CREB1                        | 2.11E-02 | FOS,IL1B             |
| TCF12                        | 2.42E-02 | IL10RA,NR4A3,ZC3H12A |
| BCL6                         | 3.35E-02 | BCL2A1,SOCS3         |
| SRF                          | 4.13E-02 | FOS                  |
| NCOR2                        | 4.13E-02 | CD69                 |
| NFATC4                       | 4.13E-02 | ITPR1                |
| ZFP36                        | 4.13E-02 | FOS                  |
| PYCARD                       | 4.13E-02 | IL1B                 |
| XBP1 (includes<br>EG:140614) | 4.13E-02 | IL6                  |
| KAT2B                        | 4.13E-02 | PTGS2                |
| NFKBIZ                       | 4.13E-02 | IL6                  |
| ELK1                         | 4.13E-02 | FOS                  |

**Pair 22**

| Transcription Regulator  | p-value of overlap | Target molecules in dataset                                                                                  |
|--------------------------|--------------------|--------------------------------------------------------------------------------------------------------------|
| CEBPA                    | 1.70E-08           | ACSL1,ALOX5AP,CAMP,CD14,CHI3L1,CXCR4,HCAR3,ID2,IL1RN,ITGAM (includes EG:16409),LTF,MMRN1,PTX3,S100A9,TNFSF10 |
| GATA1                    | 1.05E-07           | AHSP,ALAS2,HBB,LMO2,MPL,PRG2,RNASE2                                                                          |
| SPI1 (includes EG:20375) | 2.43E-05           | CHI3L1,CTSS,IL1RN,NCF1C,NCF2,PTPN6                                                                           |
| CEBPE                    | 2.70E-05           | ALOX5AP,CEBPB (includes EG:1051),ELANE,LTF                                                                   |
| IRF7                     | 3.31E-05           | CARD16,CCNA1,IFI44,IFI44L,IFIT3,IFITM1,MCL1,MX1,NAMPT,TLR4,TNFSF10                                           |
| HMGB1                    | 3.67E-05           | CCL3,CCL4,CD86,HLA-DRB1,IL8                                                                                  |
| SP1                      | 4.11E-05           | ALAS2,ALOX5,CAMP,CHI3L1,HBB,IFNGR1,MCL1,NCF2                                                                 |
| STAT3                    | 1.14E-04           | CD86,FCER1G,LILRB2,MCL1,TIMP1,TNFRSF1B,VCAN                                                                  |
| PPARA                    | 5.36E-04           | ABCA1,NCF1C,NCF2                                                                                             |
| KLF4                     | 6.50E-04           | CD14,ITGAM (includes EG:16409)                                                                               |
| NFKB1                    | 7.58E-04           | IER3,IFNGR2,IL1RN,PTPN6,TNFSF10                                                                              |
| RELA                     | 1.60E-03           | IER3,IFNGR2,IL1RN,IL8,PTPN6                                                                                  |
| CEBPB (includes EG:1051) | 1.78E-03           | ALOX5AP,CD14,IL8,PRG2                                                                                        |
| CYLD                     | 1.92E-03           | IL8,JUN                                                                                                      |
| CEBPD                    | 2.34E-03           | ALOX5AP,CD14,ITGAM (includes EG:16409)                                                                       |
| KLF2                     | 5.98E-03           | CCL3,CCL4,IL8                                                                                                |
| ELF1                     | 6.18E-03           | FCER1G,NCF2                                                                                                  |
| NFKB2                    | 6.18E-03           | CXCL12 (includes EG:20315),CXCR4                                                                             |
| SATB1                    | 6.40E-03           | CEACAM1 (includes others),EPSTI1,EVI2A,HBB,HSP90AA1,HSPA8,IRF8                                               |
| JUN                      | 7.22E-03           | JUN,NCF2,VEGFA                                                                                               |
| AHR                      | 8.61E-03           | DUSP6,ITGAM (includes EG:16409),JUN                                                                          |
| GFI1                     | 1.01E-02           | ELANE,IL6R,IL8                                                                                               |
| GATA2                    | 1.25E-02           | PRG2,RNASE2                                                                                                  |
| IRF3                     | 1.56E-02           | ADAM9,AHNAK,IFI44,IFIT3                                                                                      |
| NOTCH1                   | 1.64E-02           | GYPA,ITGAM (includes EG:16409)                                                                               |
| REL                      | 2.08E-02           | IER3,IL8                                                                                                     |
| FOXP2                    | 2.55E-02           | HBB                                                                                                          |
| NR1H3                    | 2.55E-02           | ABCA1                                                                                                        |
| TFAP2A                   | 2.55E-02           | ABCA1                                                                                                        |
| HLTF                     | 2.55E-02           | HBB                                                                                                          |
| PLAGL2                   | 2.55E-02           | NCF2                                                                                                         |
| TRIM28                   | 2.55E-02           | S100A9                                                                                                       |
| MTA2                     | 2.55E-02           | HBB                                                                                                          |
| RBPJ                     | 2.55E-02           | CAMP                                                                                                         |



|       |          |                 |
|-------|----------|-----------------|
| BACH1 | 2.55E-02 | HBB             |
| NR1D1 | 2.55E-02 | TLR4            |
| PPARG | 2.56E-02 | ABCA1,TNFSF10   |
| STAT1 | 2.78E-02 | ALAS2,CD14,IRF8 |
| IRF8  | 3.62E-02 | CCR7,CD86       |
| SP3   | 4.83E-02 | CHI3L1,NCF2     |

---

**Pair 23**

| Transcription Regulator  | p-value of overlap | Target molecules in dataset                                                                                                                                                                                                                                                                                                                                                                                                |
|--------------------------|--------------------|----------------------------------------------------------------------------------------------------------------------------------------------------------------------------------------------------------------------------------------------------------------------------------------------------------------------------------------------------------------------------------------------------------------------------|
| CEBPA                    | 9.92E-07           | AKAP12,CA2,CD14,CDKN1A,CEBPA,FOXO1 (includes EG:2308),GATA2,GLIPR1,H1FX,HCAR3,IFI27,ISG15,KLRC1,LGALS1,MPO,NFIL3,PRTN3,PTGS2,RGS2 (includes EG:19735),S100A9,STAR,TRD@,TUBB2A                                                                                                                                                                                                                                              |
| GATA1                    | 4.25E-06           | AHSP,BCL2L11,EPOR,FCER1A,GYP A,GYPB,NFE2,PF4,PRG2,RNASE2                                                                                                                                                                                                                                                                                                                                                                   |
| HNF4A                    | 1.43E-05           | AK2,AKR1C1/AKR1C2,AKR1C3,APOC2,CAMK2D,CDC42EP3,CDKN1A,CEBPA,CTSA,CXCL3,EGR1,ERLIN1,FAM107B,FAM46A,FOXO1 (includes EG:2308),G0S2,GAB1,GLA,GPR160,GSPT1,GSTK1,GUSB,HIF1A,HIST1H4A (includes others),HMGB2,HNRNPA0,HSP90B1,IL2RB,ITGB3BP,JUN,KLRF1,LDLR,MDH2 (includes EG:17448),MFSD1,MGST1,MRPL33 (includes EG:66845),NAMPT,NDFIP1,PLSCR1,RBKS,REXO2,RNASE2,RNASE3,RPS6KA5,RRM1,S100A9,SLC38A1,STAT1,TAX1BP1,TCF7L2,TMEM30A |
| EBF1                     | 2.71E-05           | CD79A,CD79B,IgLL1/IgLL5,PAX5                                                                                                                                                                                                                                                                                                                                                                                               |
| GFI1                     | 2.82E-05           | AZU1,CDKN1A,CEBPA,GFI1B,IL6R,IL8,SERPINA1                                                                                                                                                                                                                                                                                                                                                                                  |
| LYL1                     | 5.60E-05           | CCND3,EGR1,ID1,ID3 (includes EG:15903),RAPGEF2                                                                                                                                                                                                                                                                                                                                                                             |
| ATF3                     | 5.70E-05           | ATF3,CCL5,CDKN1A,ID1,JUN,LDLR,PENK                                                                                                                                                                                                                                                                                                                                                                                         |
| ELK1                     | 5.70E-05           | CDKN1A,EGR1,FUT4,JUN,MCL1,PTGS2,TNFRSF10B                                                                                                                                                                                                                                                                                                                                                                                  |
| EPAS1                    | 1.04E-04           | ADM,AKAP12,CXCL2,ENO1,FHL1 (includes EG:14199),HIST1H1C,HIST1H2AC,HOXA5,MAFF,NFIL3,PLIN2,SLC2A1,VEGFA                                                                                                                                                                                                                                                                                                                      |
| STAT5a/b                 | 1.14E-04           | BCL2L11,CDKN1A,FCGR1A,GFI1B,GYP A,GYPB,IRF1 (includes EG:16362),PTGS2                                                                                                                                                                                                                                                                                                                                                      |
| SPI1 (includes EG:20375) | 1.74E-04           | FCGR2B,FES,HMBS,Ig L@,IL1B,IRF4,ISG15,MME,PRG2,PRTN3                                                                                                                                                                                                                                                                                                                                                                       |
| IRF9                     | 2.53E-04           | IFI27,IL8,IRF7,ISG15,STAT1                                                                                                                                                                                                                                                                                                                                                                                                 |
| ATF4                     | 3.07E-04           | ATF3,DDIT4,JUN,PENK,PTGS2,TNFRSF10B,VEGFA                                                                                                                                                                                                                                                                                                                                                                                  |
| DACH1                    | 3.78E-04           | CDKN1A,CXCL3,EGR1,JUN,MEF2C                                                                                                                                                                                                                                                                                                                                                                                                |
| RARB                     | 4.08E-04           | CDKN1A,CXCL2,ID1,ID3 (includes EG:15903),IL1B,IL8,KRT1,PTGS2                                                                                                                                                                                                                                                                                                                                                               |
| KLF2                     | 4.10E-04           | ADM,CCND3,HIF1A,ID1,ID3 (includes EG:15903),IL1B,IL8,LTC4S,MYH10,PTGS2,RALA,RNASE2,RUNX2,SLC2A1,STAT1                                                                                                                                                                                                                                                                                                                      |
| ISGF3                    | 4.48E-04           | HIF1A,IRF7,ISG15                                                                                                                                                                                                                                                                                                                                                                                                           |
| PYCARD                   | 4.48E-04           | DUSP10,IL1B,IL8                                                                                                                                                                                                                                                                                                                                                                                                            |
| HIF3A                    | 4.48E-04           | HIF1A,SLC2A1,VEGFA                                                                                                                                                                                                                                                                                                                                                                                                         |

|                          |          |                                                                                                                                                                                                                                        |
|--------------------------|----------|----------------------------------------------------------------------------------------------------------------------------------------------------------------------------------------------------------------------------------------|
| NFkB (complex)           | 6.08E-04 | ATF3,BCL2L11,CCL5,CDKN1A,CXCL12 (includes EG:20315),CXCL2,CXCL3,EPCAM,ERAP2,FAM46A,FCGR1A,G0S2,HDGF,HIF1A,IER3,IGFBP2,IL1B,IL8,IRF1 (includes EG:16362),IRF4,IRF7,JUN,LTC4S,MYLK,PTGS2,TNFRSF10B,TSLP,VEGFA                            |
| NFKB1                    | 6.09E-04 | APP,CCL5,CDKN1A,CXCL2,IER3,IL1B,IL8,IRF1 (includes EG:16362),IRF4,LTC4S,PTGS2,TSLP,VEGFA                                                                                                                                               |
| E2F1                     | 6.14E-04 | BCL2L11,CA2,CCND3,CD9,CDKN1A,DUSP10,DUT,E2F2,EIF2AK2,FHL1 (includes EG:14199),HIST1H2AC,HSP90B1,ID3 (includes EG:15903),KIAA0101,KRT1,MAD2L1,MCL1,RRM1,RRM2,RYPB,TCF3,TOP2A                                                            |
| CREBBP                   | 7.12E-04 | CCL5,CDKN1A,EGR1,IRF1 (includes EG:16362),ISG15,JUN,LDLR,PTGS2,STAR                                                                                                                                                                    |
| MEOX2                    | 7.36E-04 | CDKN1A,CDKN1C,CXCL2,CXCL3,ID1,ID3 (includes EG:15903),IL8                                                                                                                                                                              |
| SMAD5                    | 9.35E-04 | GATA2,ID1,KLF1,NFE2                                                                                                                                                                                                                    |
| STAT1                    | 1.00E-03 | BCL2L11,CD14,CDKN1A,FCGR1A,IFI27,IL1B,IL8,IRF1 (includes EG:16362),IRF7,ISG15,S100A10,TNFRSF10B                                                                                                                                        |
| MYC                      | 1.06E-03 | ADM,BCAT1,CCND3,CD44 (includes EG:100330801),CDKN1A,CEBPA,CYFIP2,DNTT,E2F2,ENO1,FABP5,HIF1A,HIST1H4A (includes others),HSPB1,ID1,IER3,IGLL1/IGLL5,IL8,IRF7,LGALS1,TFRC,TNFRSF10B,VEGFA                                                 |
| Notch                    | 1.08E-03 | ADM,CDKN1A,ID1,MCL1,NET1 (includes EG:10276),SMAD1,VEGFA                                                                                                                                                                               |
| STAT3                    | 1.38E-03 | BCL2L11,CCL5,CDKN1A,FCGR1A,HGF,HIF1A,IL2RB,IL8,IRF1 (includes EG:16362),IRF4,LILRB2,MCL1,NAMPT,PTGS2,STAT1,VEGFA                                                                                                                       |
| IFI16                    | 1.43E-03 | CCL5,CDKN1A,E2F2,IL1B,IL2RB,IL8,LDLR,MGST1,MPO                                                                                                                                                                                         |
| EGR1                     | 1.43E-03 | BCL2L11,CD44 (includes EG:100330801),CDKN1A,EGR1,IL8,JUN,LDLR,PTGS2,VEGFA                                                                                                                                                              |
| RELA                     | 1.81E-03 | CCL5,CDKN1A,CXCL2,CXCL3,EGR1,ERAP2,HIF1A,IER3,IL1B,IL8,IRF1 (includes EG:16362),IRF4,LTC4S,NAMPT,PTGS2,TNFRSF10B,TSLP,VEGFA                                                                                                            |
| ELF4                     | 1.98E-03 | CA2,CDKN1A,CXCL2,HDC,IL8,PRF1                                                                                                                                                                                                          |
| ATF6                     | 2.04E-03 | APP,HSP90B1,SERPINA1,VEGFA                                                                                                                                                                                                             |
| TAF4B                    | 2.08E-03 | IER3,IGJ,IRF1 (includes EG:16362)                                                                                                                                                                                                      |
| CALR                     | 2.08E-03 | CDKN1A,CEBPA,PTGS2                                                                                                                                                                                                                     |
| STAT2                    | 2.30E-03 | IFI27,IL8,IRF1 (includes EG:16362),ISG15,MX1                                                                                                                                                                                           |
| FOXG1                    | 2.39E-03 | BCL2L11,CDKN1A                                                                                                                                                                                                                         |
| HDAC9                    | 2.39E-03 | CEBPA,JUN                                                                                                                                                                                                                              |
| HOXA9                    | 2.56E-03 | BCL2L11,FLT3,GATA2,GLRX,HNRNPU,HOXA9,IRX3,JUN,MAFB,MBNL1,NFIA,S100A8,TCN1,USP1,YWHAG                                                                                                                                                   |
| TP53 (includes EG:22059) | 2.84E-03 | ADA,ATF3,BCL2L11,CCND3,CD44 (includes EG:100330801),CDKN1A,CEBPA,DDIT4,DUSP2,DUT,EGR1,FOXO1 (includes EG:2308),GLIPR1,HDC,HIF1A,ID1,IER3,IGFBP2,IGFBP7,IL8,IRF7,ISG15,MAD2L1,MCL1,MX1,PTGS2,PYCARD,SLC2A1,TCF7L2,TNFRSF10B,TOP2A,VEGFA |
| FLI1                     | 2.89E-03 | APOC2,CCND3,EGR1,PF4,SRGN                                                                                                                                                                                                              |
| IRF1 (includes           | 3.35E-03 | CCL5,CDKN1A,IFITM3,IL1B,IL8,IRF1 (includes EG:16362),IRF4,IRF7,ISG15,MX1                                                                                                                                                               |

|                            |          |                                                                                                                                                                                 |
|----------------------------|----------|---------------------------------------------------------------------------------------------------------------------------------------------------------------------------------|
| EG:16362)                  |          |                                                                                                                                                                                 |
| REL                        | 3.37E-03 | BCL2L11,CDKN1A,IER3,IL8,IRF4,JUN,TNFRSF10B                                                                                                                                      |
| Stat1-Stat2                | 3.51E-03 | EIF2AK2,IRF1 (includes EG:16362),IRF7                                                                                                                                           |
| CTCF (includes EG:10664)   | 3.51E-03 | APP,CDKN1C,HLA-DRB1                                                                                                                                                             |
| NfkB-RelA                  | 3.60E-03 | CCL5,CXCL3,IL1B,IL8,PTGS2                                                                                                                                                       |
| ARNT                       | 3.60E-03 | AHR,ENO1,HIF1A,TFRC,VEGFA                                                                                                                                                       |
| FOXO4                      | 3.60E-03 | CDC42EP3,CDKN1A,HIF1A,IER3,VEGFA                                                                                                                                                |
| HIF1A                      | 3.63E-03 | ADM,CDKN1A,ENO1,FHL1 (includes EG:14199),HIF1A,HIST1H1C,HIST1H2AC,IL8,LGALS1,MAFF,MCL1,SLC2A1,SLC40A1,TFRC,VEGFA                                                                |
| ZBTB17                     | 3.81E-03 | CDKN1A,EGR1,IER3,SPTBN1                                                                                                                                                         |
| HDAC1                      | 4.92E-03 | CCL5,CCNA1,CD44 (includes EG:100330801),CDKN1A,IL8,PTGS2,RRM2,TAL1                                                                                                              |
| RELB                       | 5.00E-03 | CXCL12 (includes EG:20315),IL1B,IL8,IRF4                                                                                                                                        |
| CEBPB (includes EG:1051)   | 5.01E-03 | CD14,CDC42EP3,CEBPA,ID1,IL1B,IL8,LDLR,PRG2,PRTN3,PTGS2,SERPINA1,STAR                                                                                                            |
| Cyclin E                   | 5.41E-03 | CDKN1A,EGLN1,HIF1A                                                                                                                                                              |
| ZFP36                      | 5.41E-03 | CDKN1A,HIF1A,PTGS2                                                                                                                                                              |
| ELF1                       | 5.41E-03 | DNTT,FCER1A,PF4                                                                                                                                                                 |
| NFE2                       | 5.41E-03 | HMBS,KLF1,SPTA1                                                                                                                                                                 |
| MLL                        | 5.41E-03 | HOXA7,HOXA9,MEIS1                                                                                                                                                               |
| IRF7                       | 5.41E-03 | CCL5,CCNA1,IFI44,IFI44L,IFITM3,IRF1 (includes EG:16362),ISG15,MCL1,MX1,NAMPT,S100A8,STAT1                                                                                       |
| Betacatenin/TCF            | 6.93E-03 | JUN,LEF1                                                                                                                                                                        |
| TSC22D1                    | 6.93E-03 | IL1B,IL8                                                                                                                                                                        |
| TAF12 (includes EG:386637) | 6.93E-03 | IGJ,IRF1 (includes EG:16362)                                                                                                                                                    |
| Ap1                        | 7.57E-03 | ATF3,CXCL12 (includes EG:20315),GZMB,HSP90B1,IL1B,IL8,JUN,PTGS2,TSLP,VEGFA                                                                                                      |
| Cbp/p300                   | 7.82E-03 | CDKN1A,IRF1 (includes EG:16362),PTGS2                                                                                                                                           |
| IKZF1                      | 7.82E-03 | CCND3,DNTT,FLT3                                                                                                                                                                 |
| HDAC4                      | 8.07E-03 | MEF2C,PTGS2,SLC2A1,VEGFA                                                                                                                                                        |
| SRF                        | 8.91E-03 | AKAP12,CDKN1A,EGR1,GLIPR1,JUN,MCL1,MEIS1,MGST1,MYLK,PTGS2                                                                                                                       |
| SREBF2                     | 9.98E-03 | CDKN1A,LDLR,PLIN2,STAR                                                                                                                                                          |
| PAX5                       | 1.08E-02 | BLNK,CD79A,IIGLL1/IIGLL5                                                                                                                                                        |
| KLF1                       | 1.08E-02 | BCL11A,CD44 (includes EG:100330801),CDKN1A                                                                                                                                      |
| ID2                        | 1.08E-02 | BCL2L11,CD79A,CDKN1A                                                                                                                                                            |
| SP1                        | 1.19E-02 | CDKN1A,CXCL12 (includes EG:20315),EIF2AK2,FES,HDC,HGF,HIST1H4A (includes others),IFITM3,IL1B,IL2RB,IL8,IRF1 (includes EG:16362),IRF4,LDLR,MCL1,PTGS2,SPARC,STAR,TNFRSF10B,VEGFA |
| ESR1                       | 1.24E-02 | CDKN1A,CXCL3,EGR1,ENO1,IER3,IFI27,IL8,IRF4,LDLR,PTGS2,SOCS2,VEGFA                                                                                                               |

|                                |          |                                                                                            |
|--------------------------------|----------|--------------------------------------------------------------------------------------------|
| PPARG                          | 1.30E-02 | APP,CDKN1A,CEBPA,IL1B,IL8,LDLR,MPO,PLIN2,PTGS2,VEGFA                                       |
| TAF9                           | 1.34E-02 | IL8,IRF1 (includes EG:16362)                                                               |
| COPS5                          | 1.34E-02 | CDKN1A,HIF1A                                                                               |
| TBX1                           | 1.34E-02 | CDKN1A,LEF1                                                                                |
| CEBPD                          | 1.41E-02 | CD14,CDKN1C,IL1B,PRTN3,PTGS2                                                               |
| ATF2                           | 1.41E-02 | ATF3,DUSP10,JUN,PENK,PTGS2                                                                 |
| PBX1                           | 1.43E-02 | CDKN1A,HOXA3,TCF7L2                                                                        |
| Creb                           | 1.46E-02 | EGR1,JUN,KRT1,LDLR,PENK,POU2AF1,PTGS2,VEGFA                                                |
| PPARD                          | 1.46E-02 | IGFBP2,PTGS2,VEGFA,YWHAE                                                                   |
| TFDP1                          | 1.46E-02 | CCNA1,CCND3,CDKN1A,TCF3                                                                    |
| FOXO1<br>(includes<br>EG:2308) | 1.62E-02 | BCL2L11,CDC42EP3,CDKN1A,CDKN1C,DDIT4,FOXO1 (includes EG:2308),IER3,IL17RA,JUN,NUSAP1,RUNX2 |
| TWIST1                         | 1.74E-02 | CDKN1A,RUNX2,TCF3,ZEB2                                                                     |
| SUPT16H                        | 1.74E-02 | CDKN1A,EGR1,HIST1H1C,HIST1H2AC                                                             |
| MYOD1                          | 1.74E-02 | BCL2L11,CDKN1C,MAFB,RBM38                                                                  |
| HLX                            | 1.84E-02 | CDKN1C,EGR1,JUN                                                                            |
| TP63                           | 2.12E-02 | AHR,BCL2L11,CDKN1A,CSTA,ID1,IL8,ITGA4,MAFF,PPBP,S100A8,TNFRSF10B,VEGFA                     |
| Foxo                           | 2.16E-02 | BCL2L11,CDKN1A                                                                             |
| Stat1 dimer                    | 2.16E-02 | FCGR1A,IRF1 (includes EG:16362)                                                            |
| TEAD4                          | 2.16E-02 | JUN,VEGFA                                                                                  |
| MEIS1                          | 2.16E-02 | CDKN1A,PF4                                                                                 |
| PAWR                           | 2.16E-02 | APP,TNFRSF10B                                                                              |
| ENO1                           | 2.16E-02 | ENO1,PTGS2                                                                                 |
| SP3                            | 2.25E-02 | CDKN1A,CEBPA,EIF2AK2,HGF,IL2RB,LDLR,PTGS2,SPARC,VEGFA                                      |
| Smad                           | 2.30E-02 | CDKN1A,EGLN1,VEGFA                                                                         |
| MECP2                          | 2.30E-02 | CCNA1,PLA2G16,VEGFA                                                                        |
| NFKB2                          | 2.30E-02 | CDKN1A,CXCL12 (includes EG:20315),IL8                                                      |
| RORC                           | 2.30E-02 | HIF1A,IL1B,VEGFA                                                                           |
| NR4A1                          | 2.35E-02 | ATF3,BRE,CXCL12 (includes EG:20315),HIF1A,LDLR,STAR                                        |
| EZH2                           | 2.37E-02 | BCL2L11,CCND3,CDK6,CDKN1A,CXCL2,IL8,MNDA,PRG2,PTGS2,SERPINA1,SPIB,WASF1                    |
| RUNX1                          | 2.64E-02 | BCL2L11,CDKN1A,CEBPA,NFE2,VEGFA                                                            |
| FOS                            | 2.74E-02 | CSTA,EGR1,IL8,JUN,PENK,PTGS2,PTPRO,VEGFA                                                   |
| TFEB                           | 2.75E-02 | CTSA,GLA,NEU1,TPP1 (includes EG:1200)                                                      |
| NCOR2                          | 2.83E-02 | CDKN1A,PTGS2,STAR                                                                          |
| PRDM1                          | 2.83E-02 | ID3 (includes EG:15903),LGALS1,SPIB                                                        |
| IRF3 dimer                     | 3.14E-02 | CCL5,ISG15                                                                                 |
| CYLD                           | 3.14E-02 | IL8,JUN                                                                                    |
| POU2AF1                        | 3.14E-02 | CD79A,CD79B                                                                                |
| STAT6 (includes<br>EG:20852)   | 3.28E-02 | CCL23,CCL5,FCGR1A,IRF1 (includes EG:16362),IRF4                                            |

|                   |          |                                                                                                                    |
|-------------------|----------|--------------------------------------------------------------------------------------------------------------------|
| MYBL2             | 3.41E-02 | CCNA1,CDC25B,TOP2A                                                                                                 |
| THRA              | 3.41E-02 | APP,CDKN1A,JUN                                                                                                     |
| HOXA10            | 3.85E-02 | BCL2L11,CDKN1A,CSTA,HLA-DQA1,HMBS,IRX3,P4HB,S100A12                                                                |
| E2F4              | 3.86E-02 | CCNA1,CDKN1A,DUT,E2F2,HIST1H2AC,HSP90B1,ID3 (includes EG:15903),KIAA0101,MAD2L1,MCL1,PLSCR1,RRM1,RRM2, TMPO, TOP2A |
| N-cor             | 4.25E-02 | CDKN1A,PTGS2                                                                                                       |
| ZNF148            | 4.25E-02 | CDKN1A,STAT1                                                                                                       |
| PITX2             | 4.25E-02 | FOXO1 (includes EG:2308),LEF1                                                                                      |
| FHL2              | 4.25E-02 | BCL2L11,IL8                                                                                                        |
| DAXX              | 4.25E-02 | CDKN1A,HSPB1                                                                                                       |
| RARA              | 4.40E-02 | CCNA1,CDKN1A,PENK,PTGS2,TNFRSF10B                                                                                  |
| KDM5B             | 4.46E-02 | ARL6IP5,FABP5,FHL1 (includes EG:14199),IGFBP2,ISG15,LGALS3BP,PLS3, TOP2A, TUBB2A                                   |
| STAT              | 4.56E-02 | CDKN1A,EIF2AK2,IRF1 (includes EG:16362),SOCS2                                                                      |
| ETS1              | 4.64E-02 | APOC2,CD14,CD79A,CDKN1A,EGR1,HGF,SRGN,VEGFA                                                                        |
| AHR               | 4.70E-02 | CDKN1A,IL1B,IRF1 (includes EG:16362),JUN,PTGS2,VEGFA                                                               |
| E2F5              | 4.74E-02 | CCNA1,CDKN1A,DUSP10                                                                                                |
| BCL6              | 4.81E-02 | BACH2,CDKN1A,IL2RB,IRF4,PTPRO                                                                                      |
| HMGB1             | 4.81E-02 | CDKN1A,CXCL3,HLA-DRB1,IL1B,IL8                                                                                     |
| ASB2              | 4.89E-02 | HOXA9                                                                                                              |
| ZNF384            | 4.89E-02 | RUNX2                                                                                                              |
| SPIC              | 4.89E-02 | FCGR2B                                                                                                             |
| NKRF              | 4.89E-02 | IL8                                                                                                                |
| KDM4A             | 4.89E-02 | FHL1 (includes EG:14199)                                                                                           |
| FANK1             | 4.89E-02 | JUN                                                                                                                |
| KLF16             | 4.89E-02 | CDKN1A                                                                                                             |
| SMAD1/5           | 4.89E-02 | ID1                                                                                                                |
| JDP2              | 4.89E-02 | JUN                                                                                                                |
| Atf               | 4.89E-02 | JUN                                                                                                                |
| ELL               | 4.89E-02 | CDKN1A                                                                                                             |
| CITED4            | 4.89E-02 | HIF1A                                                                                                              |
| SALL2             | 4.89E-02 | CDKN1A                                                                                                             |
| HBP1              | 4.89E-02 | CDKN1A                                                                                                             |
| MEF2BNB-<br>MEF2B | 4.89E-02 | JUN                                                                                                                |
| AATF              | 4.89E-02 | APP                                                                                                                |
| ING4              | 4.89E-02 | CDKN1A                                                                                                             |
| ZNF91             | 4.89E-02 | FCGR2B                                                                                                             |
| SRCAP             | 4.89E-02 | CDKN1A                                                                                                             |
| ZNF197            | 4.89E-02 | HIF1A                                                                                                              |
| TEF               | 4.89E-02 | MYLK                                                                                                               |

|        |          |                                           |
|--------|----------|-------------------------------------------|
| ZHX2   | 4.89E-02 | HDC                                       |
| NKX3-2 | 4.89E-02 | RUNX2                                     |
| SNW1   | 4.89E-02 | CDKN1A                                    |
| ATF5   | 4.89E-02 | ID1                                       |
| ZNF140 | 4.89E-02 | FCGR2B                                    |
| IRF3   | 4.92E-02 | AHNAK,CCL5,IFI44,IL8,IRF7,ISG15,TMPO,TSLP |
